# Supplementary material for: Pillar[5]arene-based chiral 3D polymer network for heterogeneous asymmetric catalysis
Source: Royal Society of Chemistry journal article supplement (doi:10.1039/c7py01669g), 2017-01-01
Supplement: c7py01669g1.pdf [file c7py01669g1.pdf]

## Electronic Supplementary Information

### Pillar[5]arene-Based Chiral 3D Polymer Network for Heterogeneous Asymmetric Catalysis

Huangtianzhi Zhu, Bingbing Shi, Lina Gao, Yuezhou Liu, Pei-Ren Liu, Liqing Shangguan, Zhengwei Mao\* and Feihe Huang\*

#### 1. Synthesis of DBEP5<sup>[S1]</sup>

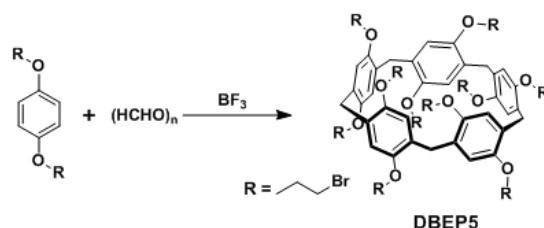

**Scheme S1.** Synthetic route to **DBEP5**.

1,4-bis(2-bromoethoxy)benzene (20.0 g, 61.7 mmol) and paraformaldehyde (3.74 g, 123 mmol) was mixed in 600 mL of 1,2-dichloroethane, and  $\text{BF}_3 \cdot \text{OEt}_2$  (7.79 mL, 98%, 61.7 mmol) was added. The reaction was monitored by TLC. 200 mL of water was added to quench the reaction. The organic layer was concentrated and purified through column chromatography using hexane:dichloromethane = 1:1 to obtain pure **DBEP5** as a white solid (6.01g, 29.1%).  $^1\text{H}$  NMR (400 MHz,  $\text{CDCl}_3$ , 298 K)  $\delta$ (ppm): 6.91 (s, 10H), 4.22 (t,  $J = 5.6$  Hz, 20H), 3.84 (s, 10H), 3.64 (t,  $J = 5.6$  Hz, 20H).  $^{13}\text{C}$  NMR (100 MHz,  $\text{CDCl}_3$ , 298 K)  $\delta$ (ppm): 149.66, 129.06, 116.04, 68.97, 30.79, 29.41.

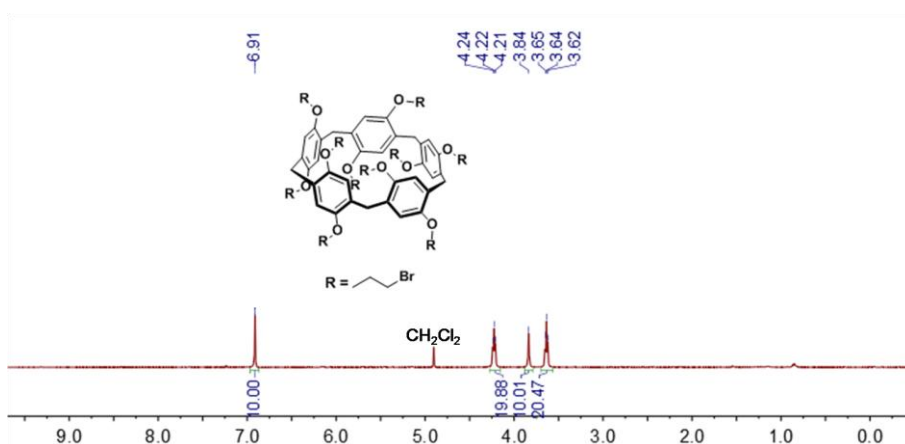

**Fig. S1.**  $^1\text{H}$  NMR spectrum (400 MHz,  $\text{CDCl}_3$ , 298 K) of **DBEP5**.

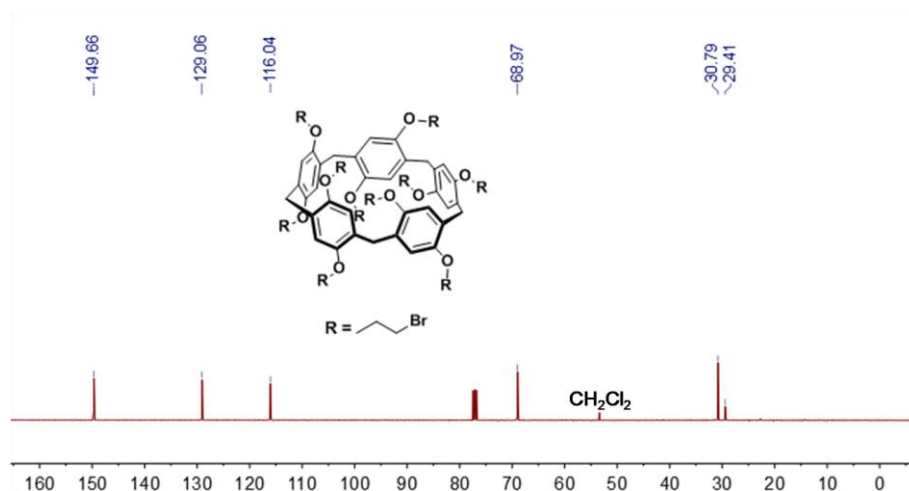

**Fig. S2.**  $^{13}\text{C}$  NMR spectrum (100 MHz,  $\text{CDCl}_3$ , 298 K) of **DBEP5**.

## 2. Synthesis of TADP5 and TADP5Ti

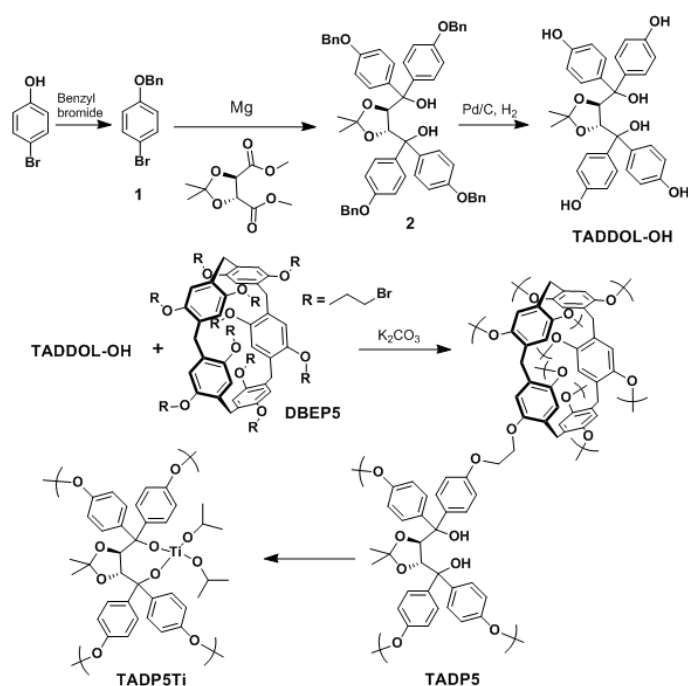

**Scheme S2.** Synthetic route to **TADP5** and **TADP5Ti**.

Synthesis of compound **1**<sup>[S2]</sup>: To a solution of 4-bromophenol (10.0 g, 57.8 mmol) and benzyl bromide (14.0 g, 81.9 mmol) in acetonitrile (150 mL),  $\text{K}_2\text{CO}_3$  (13.8 g, 100 mmol) was added under argon atmosphere. The mixture was stirred under reflux for 4 days. After that, the solvent was removed and crude product was purified through column chromatography on silica gel using hexane:ethyl acetate = 10:1 as the eluent to obtain pure **1** as a pale yellow oil (11.4 g, 75.6%).  $^1\text{H}$  NMR (400 MHz,  $\text{CDCl}_3$ , 298 K)  $\delta$ (ppm): 7.34 (dd,  $J = 10.1, 7.9$  Hz, 7H),

6.80 (d,  $J = 8.9$  Hz, 2H), 4.96 (s, 2H).  $^{13}\text{C}$  NMR (100 MHz,  $\text{CDCl}_3$ , 298 K)  $\delta$ (ppm): 157.95, 136.64, 132.39, 128.75, 128.22, 127.55, 116.78, 113.22, 70.26.

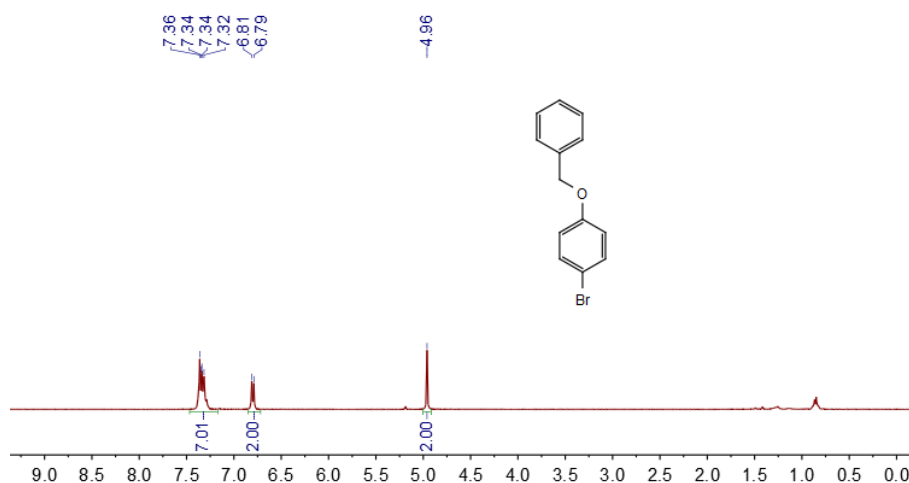

**Fig. S3.**  $^1\text{H}$  NMR spectrum (400 MHz,  $\text{CDCl}_3$ , 298 K) of **1**.

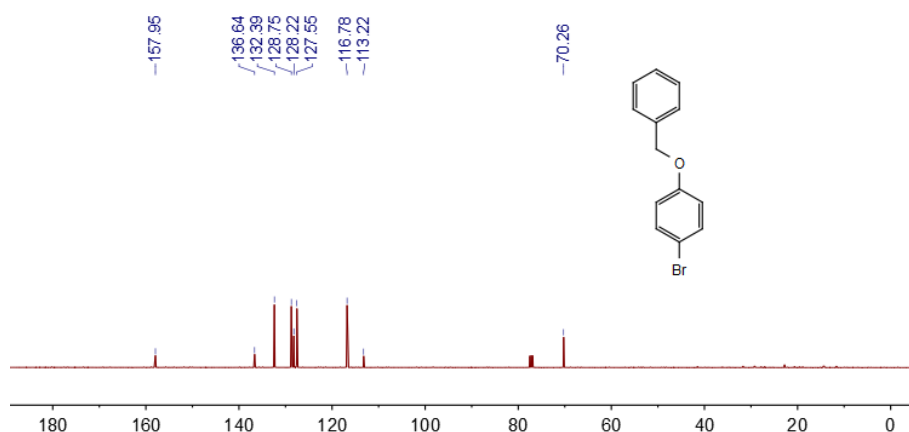

**Fig. S4.**  $^{13}\text{C}$  NMR spectrum (100 MHz,  $\text{CDCl}_3$ , 298 K) of **1**.

**Synthesis of compound 2:** Under protection of argon, magnesium (1.20 g, 50.0 mmol) and a piece of iodine were heated, followed by adding a few drops of compound **1** (11.4 g, 43.7 mmol) in 100 mL of anhydrous THF. After the Grignard reaction was triggered successfully, the solution of compound **1** in THF was added under reflux and stirred for 8 hours. The mixture was cooled to  $-12.0$   $^{\circ}\text{C}$ , and then (4*R*,5*R*)-2,2-dimethyl-1,3-dioxolane-4,5-dicarboxylic acid dimethyl ester (2.00 g, 9.17 mmol) in 30.0 mL of anhydrous THF was added dropwise and reacted for 18 hours. After the reaction was quenched by  $\text{NH}_4\text{Cl}$ , the solvent was evaporated to get a residue, which was passed through column chromatography on silica gel using hexane:ethyl acetate = 3:1 as the eluent to obtain a crude product, which was further recrystallized in ethanol to get pure product as a pale yellow solid (6.08 g, 74.5%).  $^1\text{H}$  NMR (400 MHz,  $\text{CDCl}_3$ , 298 K)  $\delta$ (ppm): 7.49–7.27 (m, 26H), 7.23 (d, 2H), 6.93 (d,  $J = 8.8$  Hz, 4H), 6.85 (d,  $J = 8.8$  Hz, 4H), 5.04 (d,  $J$

= 21.8 Hz, 8H), 4.47 (s, 2H), 3.98 (s, 2H), 1.05 (s, 6H).  $^{13}\text{C}$  NMR (100 MHz,  $\text{CDCl}_3$ , 298 K)  $\delta$  (ppm): 157.97, 138.64, 137.02, 135.30, 129.74, 128.92, 128.59, 127.98, 127.74–127.28, 114.28, 113.54, 109.23, 81.10, 77.62, 69.97, 27.23. HRESIMS:  $m/z$  calcd for  $[\text{M} - \text{H}]^-$   $\text{C}_{59}\text{H}_{53}\text{O}_8^-$ , 889.3819, found 889.3774, error –5.1 ppm.

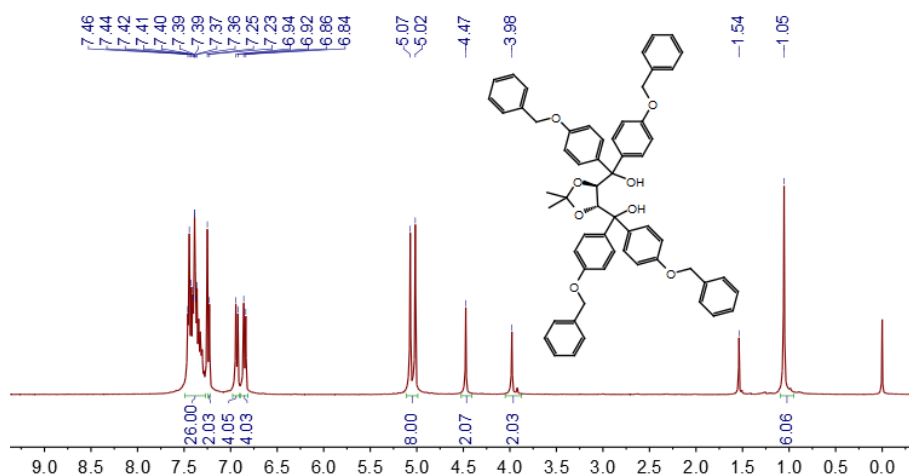

**Fig. S5.**  $^1\text{H}$  NMR spectrum (400 MHz,  $\text{CDCl}_3$ , 298 K) of **2**.

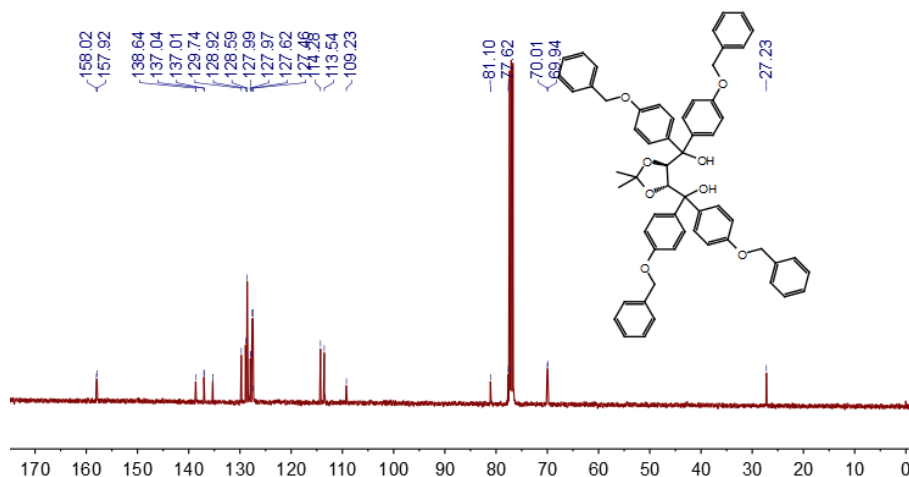

**Fig. S6.**  $^{13}\text{C}$  NMR spectrum (100 MHz,  $\text{CDCl}_3$ , 298 K) of **2**.

**Synthesis of TADDOL-OH:** To a solution of compound **2** (4.45g, 5.00 mmol) in 100 mL of ethyl acetate was added 3.00 g of Pd/C. The mixture was stirred in hydrogen atmosphere for 4 days. After that, undissolved solid was filtered, and the solvent was removed on a rotation evaporator to obtain pure **TADDOL-OH** as a pale yellow solid (2.62 g, 99%).  $^1\text{H}$  NMR (400 MHz, acetone- $d_6$ , 298 K)  $\delta$  (ppm): 8.27 (d,  $J$  = 10.4 Hz, 4H), 7.40 (d,  $J$  = 8.6 Hz, 4H), 7.18 (d,  $J$  = 8.7 Hz, 4H), 6.80 (d,  $J$  = 8.6 Hz, 4H), 6.68 (d,  $J$  = 8.7 Hz, 4H), 6.28 (s, 2H), 4.42 (s, 2H), 1.00 (s, 6H).  $^{13}\text{C}$  NMR (100 MHz, acetone- $d_6$ , 298 K)  $\delta$  (ppm): 157.15, 139.21, 135.29, 130.91, 130.06, 114.99, 114.47, 109.12, 82.70, 77.85, 27.48. HRESIMS:  $m/z$  calcd for  $[\text{M} + \text{Na}]^+ \text{C}_{31}\text{H}_{30}\text{O}_8\text{Na}^+$ , 553.1833, found 553.1838, error –1 ppm.

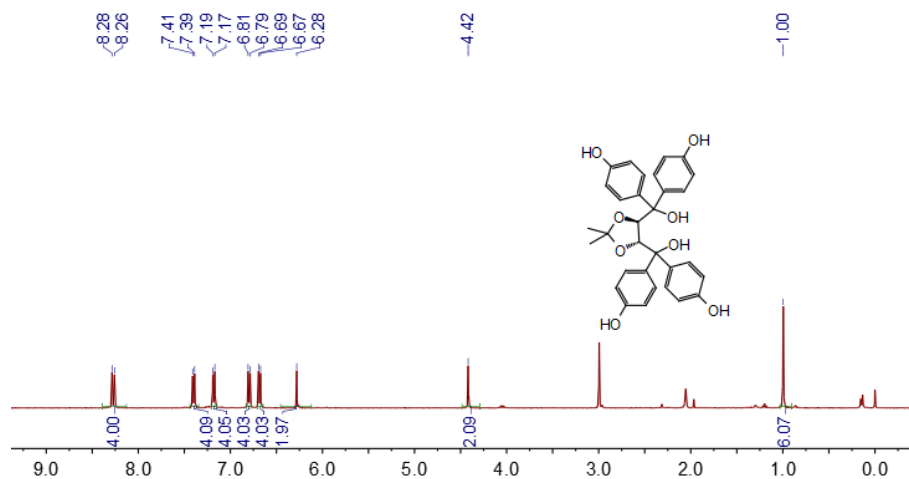

**Fig. S7.** <sup>1</sup>H NMR spectrum (400 MHz, acetone-*d*<sub>6</sub>, 298 K) of **TADDOL-OH**.

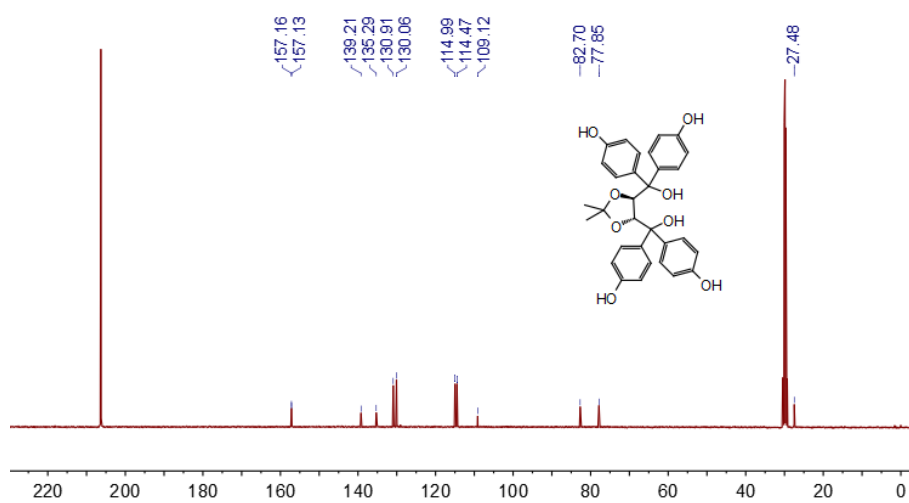

**Fig. S8.** <sup>13</sup>C NMR spectrum (100 MHz, acetone-*d*<sub>6</sub>, 298 K) of **TADDOL-OH**.

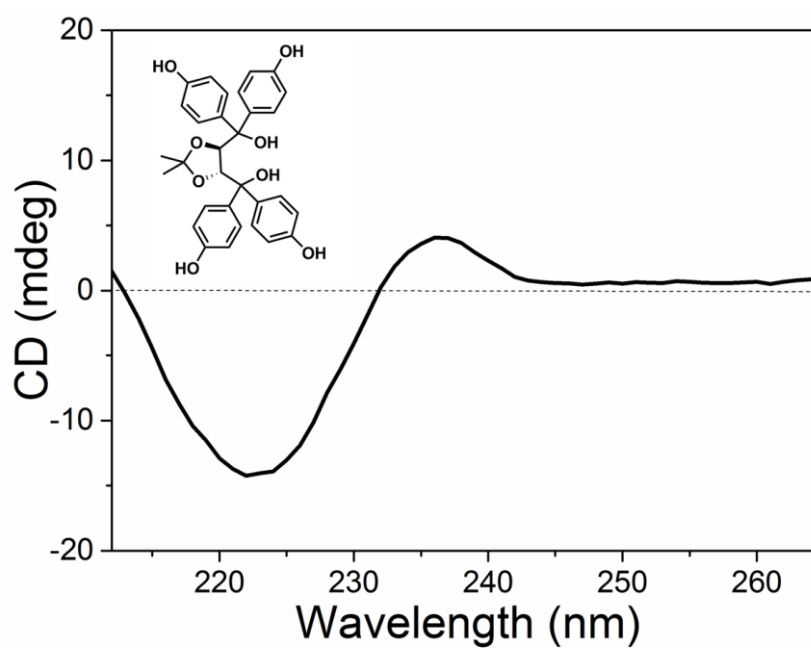

**Fig. S9.** CD spectrum of **TADDOL-OH** in methanol.

Synthesis of chiral cross-linking organic material **TADP5**: To a solution of **TADDOL-OH** (0.795 g, 1.50 mmol) in 30.0 mL of CH<sub>3</sub>CN was added K<sub>2</sub>CO<sub>3</sub> (3.00 g, 21.7 mmol) and **DBEP5** (1.00 g, 0.60 mmol). The mixture was stirred under reflux for 3 days. After that, the insoluble solid was filtered. The white solid was washed thoroughly with water, diluted HCl and acetone on ultrasound, and then dried in vacuum. The final product (0.704 g) is white, insoluble powder.

Preparation of **TADP5Ti**: Under protection of argon, **TADP5** (95.0 mg, ~0.140 mmol) was suspended in 1.50 mL of anhydrous toluene with vigorous stirring, and then 41.5  $\mu$ L (0.140 mmol) of Ti(O<sup>*i*</sup>Pr)<sub>4</sub> was added *via* syringe. After 4 hours stirring, insoluble solid was filtered, thoroughly washed with anhydrous toluene, and dried in vacuum to obtain a yellow solid. Due to the instability of organic titanate, **TADP5Ti** was susceptible to moisture and should be analyzed instantly.

### 3. Solid-state <sup>13</sup>C HPDEC MAS NMR spectra of TADP5.

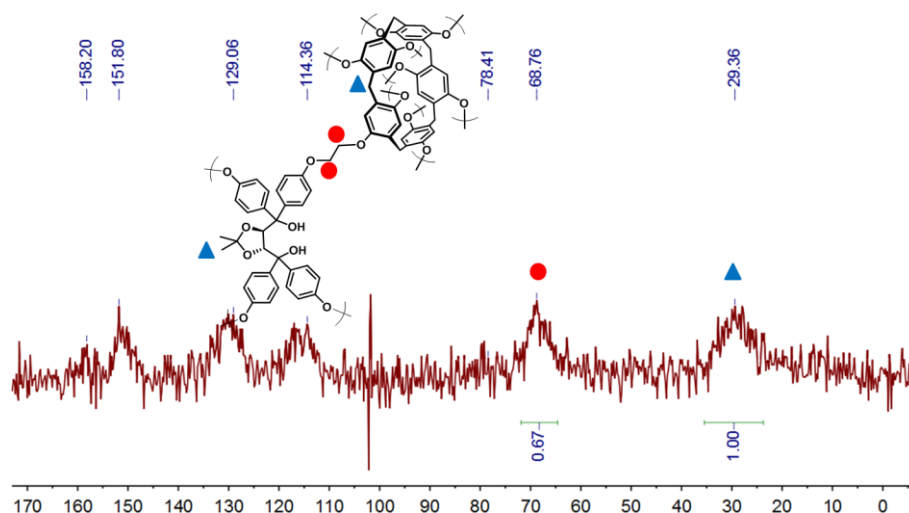

**Fig. S10.** Solid-state <sup>13</sup>C HPDEC MAS NMR spectrum of **TADP5**. The peaks at 29 ppm and 68 ppm were used for integrals. According to our calculation, the ratio between **TADDOL** unit and pillar[5]arene moiety is 7:1.

#### 4. FT-IR spectra

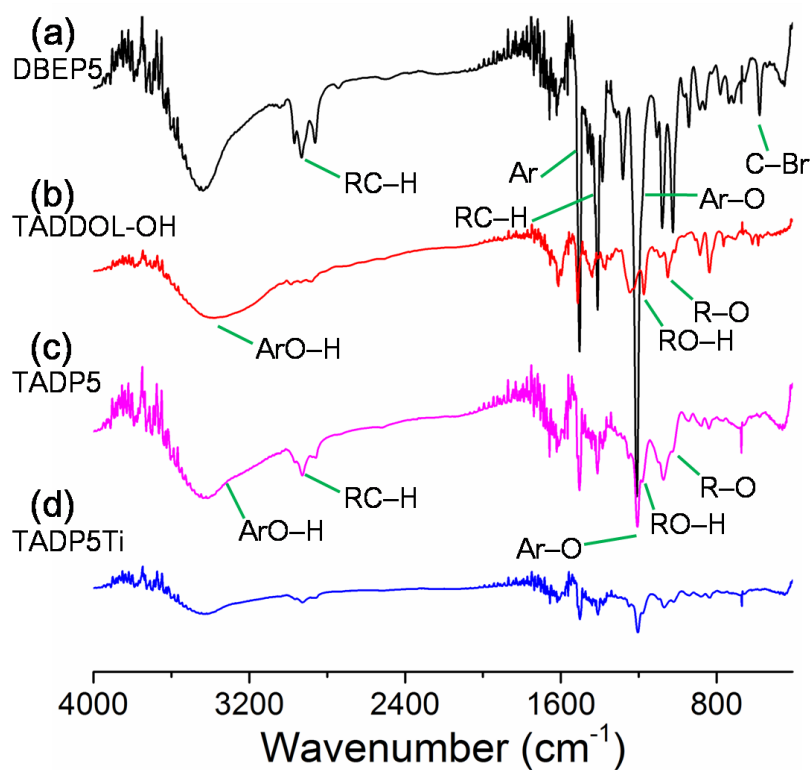

**Fig. S11.** FT-IR spectra (KBr pellet) of (a) **DBEP5**, (b) **TADDOL-OH**, (c) **TADP5**, and (d) **TADP5Ti**. Significant peaks are marked in the spectra (“Ar” and “R” denote aryl and alkyl groups, respectively.)

#### 5. Thermogravimetric (TG) analysis

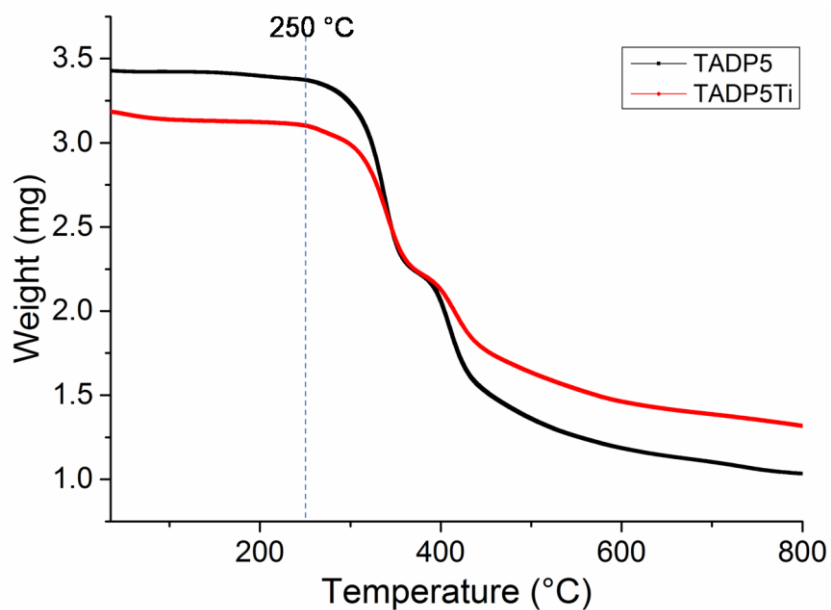

**Fig. S12.** TG analysis of **TADP5** (black line) and **TADP5Ti** (red line). From the data, we know that both two compounds are stable at 250  $^{\circ}\text{C}$ .

## 6. Powder X-ray diffraction (XRD) analysis

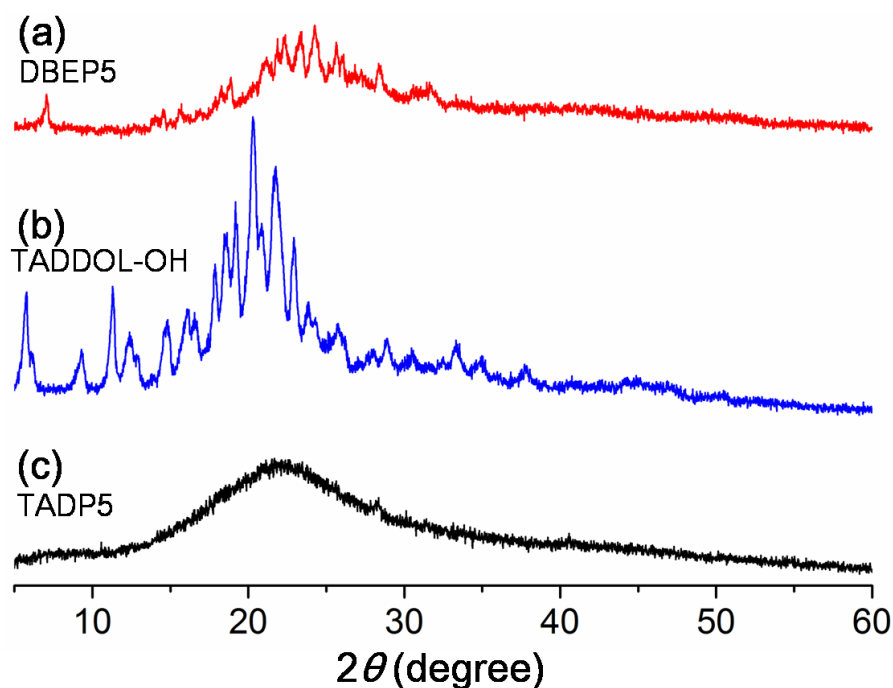

**Fig. S13.** Powder XRD analysis of (a) DBEP5, (b) TADDOL-OH and (c) TADP5.

## 7. Inductively coupled plasma mass spectrometry (ICP-MS) analysis

| Number <sup>⚡</sup> | Sample <sup>⚡</sup>    | Ti (μg/L) <sup>⚡</sup> |
|---------------------|------------------------|------------------------|
| 1 <sup>⚡</sup>      | TADP5Ti-1 <sup>⚡</sup> | 4.64 <sup>⚡</sup>      |
| 2 <sup>⚡</sup>      | TADP5Ti-2 <sup>⚡</sup> | 2.87 <sup>⚡</sup>      |
| 3 <sup>⚡</sup>      | TADP5Ti-3 <sup>⚡</sup> | 59.2 <sup>⚡</sup>      |

TADP5Ti-1 · 100ug/L · 4.64%<sup>⚡</sup>  
TADP5Ti-2 · 50ug/L · 5.74%<sup>⚡</sup>  
TADP5Ti-3 · 2000ug/L · 2.96%<sup>⚡</sup>  
Average · 4.45%<sup>⚡</sup>

**Fig. S14.** ICP-MS analysis of TADP5Ti for evaluating the content of titanium. 1.00 mg of TADP5Ti was dissolved in 1.00 mL of pure HNO<sub>3</sub> to form a transparent solution. The solution was diluted to 2000 μg/L, 100 μg/L and 50 μg/L for ICP-MS analysis. The average content of titanium was determined to be 4.45%.



## 8. Energy dispersive X-ray spectroscopy (EDX) analysis

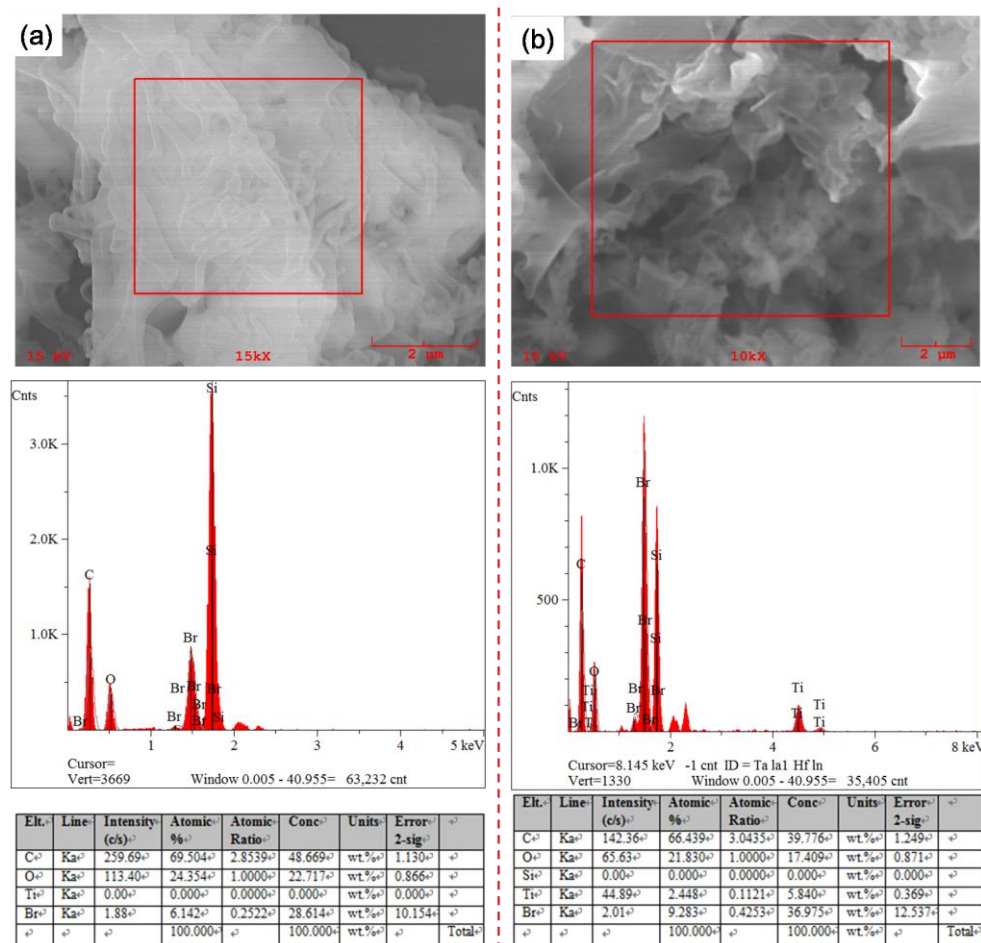

**Fig. S15.** EDX analysis of (a) **TADP5** and (b) **TADP5Ti**. The SEM images (top) show the areas for EDX analysis, the spectra (middle) show the analyzed elements, and the tables (bottom) show the approximate content of each element. The peaks of titanium indicate the titanium species were successfully loaded within the materials. The peaks of bromine are ascribed to the 2-bromoethyl group in **DBEP5**. The peaks of silicon come from the silicon wafer used in SEM.

## 9. Asymmetric addition reaction of ZnEt<sub>2</sub> to aryl aldehydes

**General procedure of asymmetric addition reaction:** To a suspension of **TADP5** (95 mg, 0.14 mmol) in 1.5 mL of anhydrous toluene was added Ti(O<sup>*i*</sup>-Pr)<sub>4</sub> (0.40 mL, 1.35 mmol) and the reaction mixture was stirred at room temperature for four hours in argon. After cooling to −30 °C, aryl aldehyde (0.45 mmol) and ZnEt<sub>2</sub> (1.0 mL, 1.0 M in hexane, 1.0 mmol) were added carefully *via* a syringe. The mixture was stirred at −30 °C for 48 hours. 2.0 mL of diluted HCl and 1.0 mL of diethyl ether were added to quench the reaction. Undissolved polymer was filtered. Filtrate was dried and then purified on flash column chromatography on silica gel using hexane:ethyl acetate = 10:1 as the eluent to obtain pure 1-arylpropan-1-ol. The

product was dissolved in isopropanol for chiral HPLC. The structure of product was analyzed by NMR spectroscopy.

The racemic 1-arylpropan-1-ol was synthesized through a reported method:<sup>[S3]</sup> Under being catalyzed by 18-crown-6 and KI, a 1:1 mixture of (*R*)- and (*S*)-1-arylpropan-1-ol could be obtained by the addition reaction of ZnEt<sub>2</sub> to aryl aldehyde in good yield. The racemic product was used in chiral HPLC for comparison.

### (*S*)-1-phenylpropan-1-ol

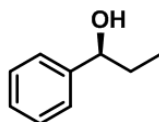

Colorless oil, 88% yield. <sup>1</sup>H NMR (400 MHz, CDCl<sub>3</sub>, 298 K)  $\delta$ (ppm): 7.30 (dd, *J* = 6.9, 1.2 Hz, 5H), 4.51 (t, *J* = 6.6 Hz, 1H), 2.39 (s, 1H), 1.76 (s, 2H), 0.87 (t, *J* = 7.4 Hz, 3H). <sup>13</sup>C NMR (100 MHz, CDCl<sub>3</sub>, 298 K)  $\delta$ (ppm): 143.52, 127.36, 126.46, 124.95, 75.00, 30.83, 9.11. The enantiomeric excess was determined by chiral HPLC with Daicel chiral OD-H column at 220 nm: 25 °C; hexane: iPrOH = 98:2; flow rate = 1.0 mL/min; *ee* = 94%.

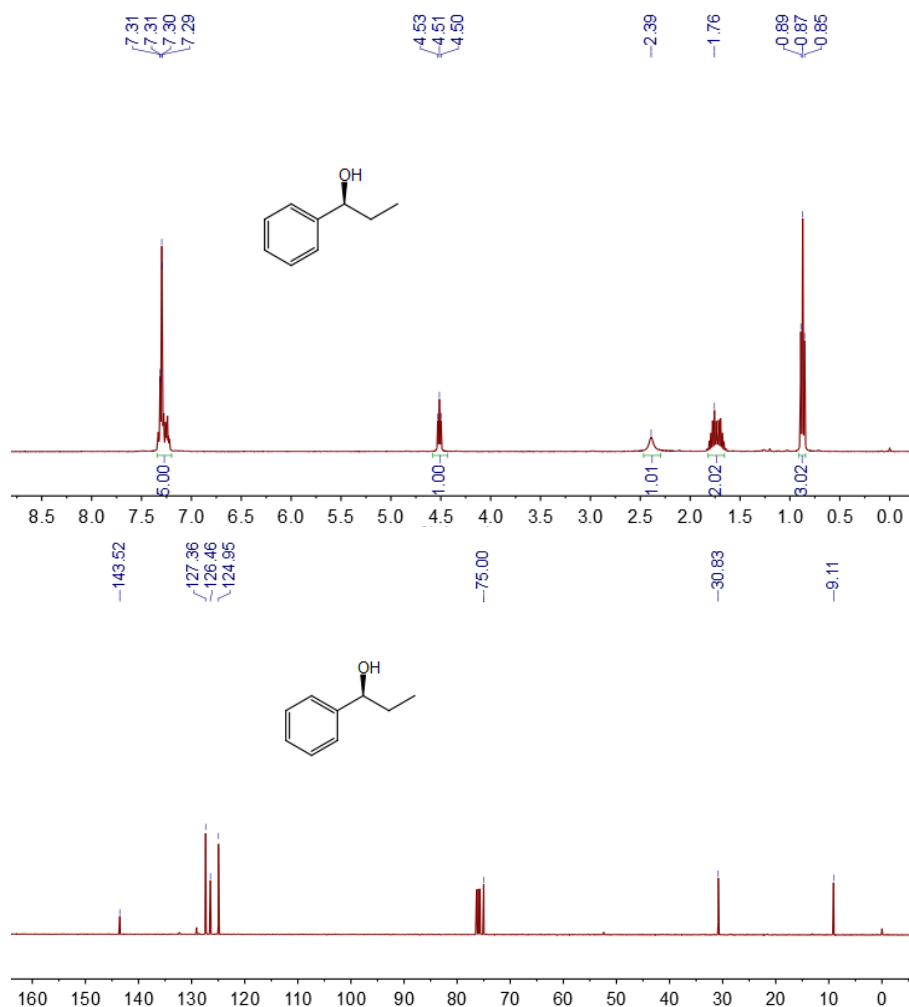

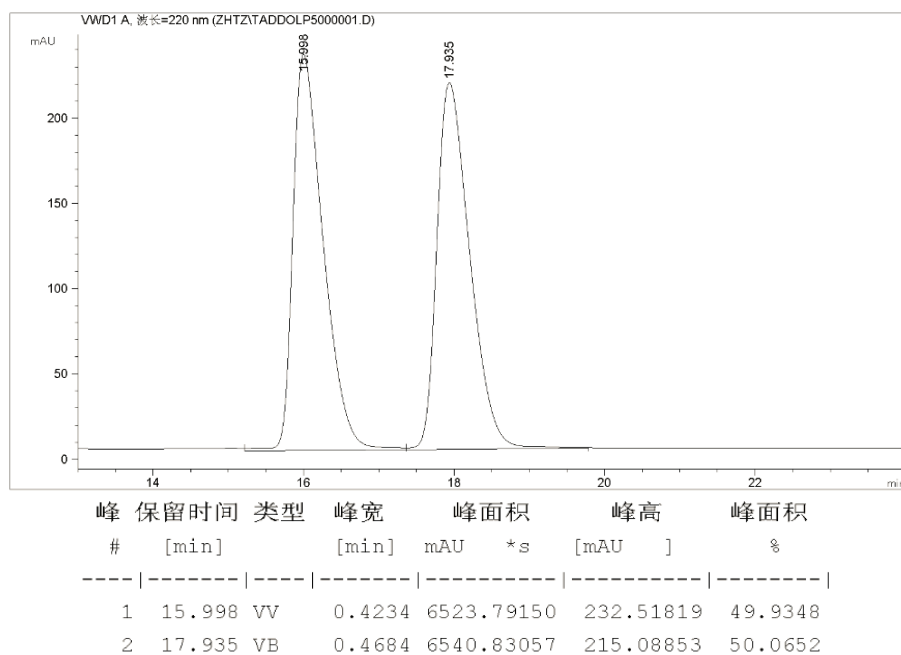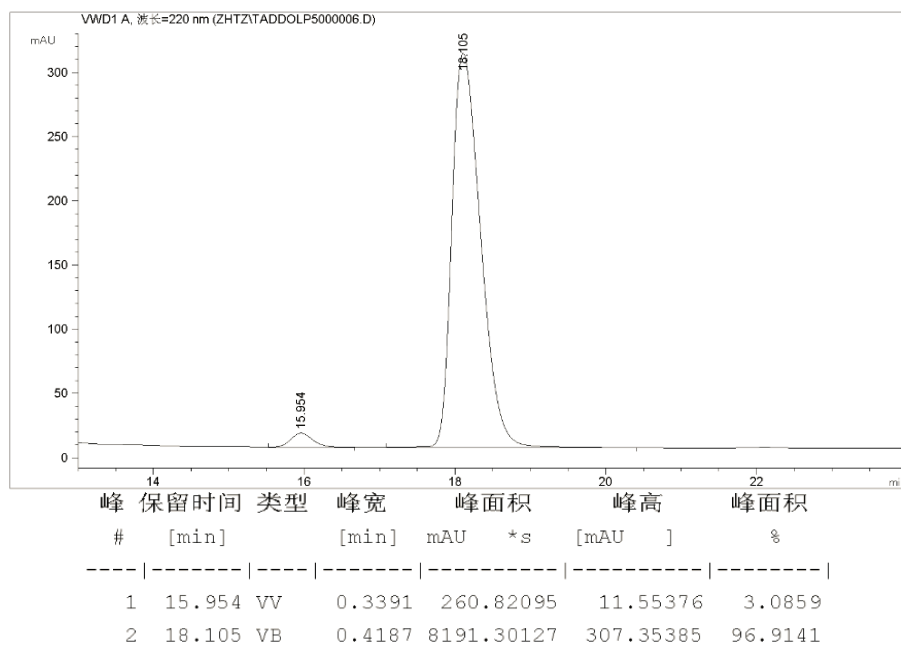

### (S)-1-*p*-tolylpropan-1-ol

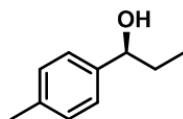

Colorless oil, 91% yield.  $^1\text{H}$  NMR (400 MHz,  $\text{CDCl}_3$ , 298 K)  $\delta$  (ppm): 7.23 (d,  $J = 8.0$  Hz, 2H), 7.17 (s, 2H), 4.53 (td,  $J = 6.8, 2.4$  Hz, 1H), 2.37 (s, 3H), 2.23 (d,  $J = 2.4$  Hz, 1H), 1.84 – 1.72 (m, 2H), 0.92 (t,  $J = 7.4$  Hz, 3H).  $^{13}\text{C}$  NMR (100 MHz,  $\text{CDCl}_3$ , 298 K)  $\delta$  (ppm): 141.70, 137.10, 129.08, 126.01, 75.87, 31.81, 21.15, 10.25. The enantiomeric excess was determined by chiral HPLC with Daicel chiral AD-H column at 220 nm: 25  $^\circ\text{C}$ ; hexane:iPrOH = 99:1; flow rate = 1.0 mL/min;  $ee = 84\%$ .

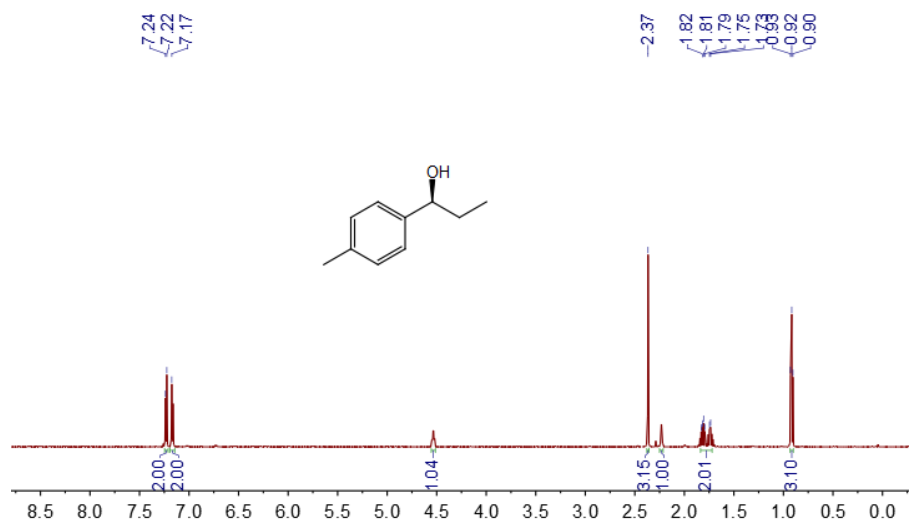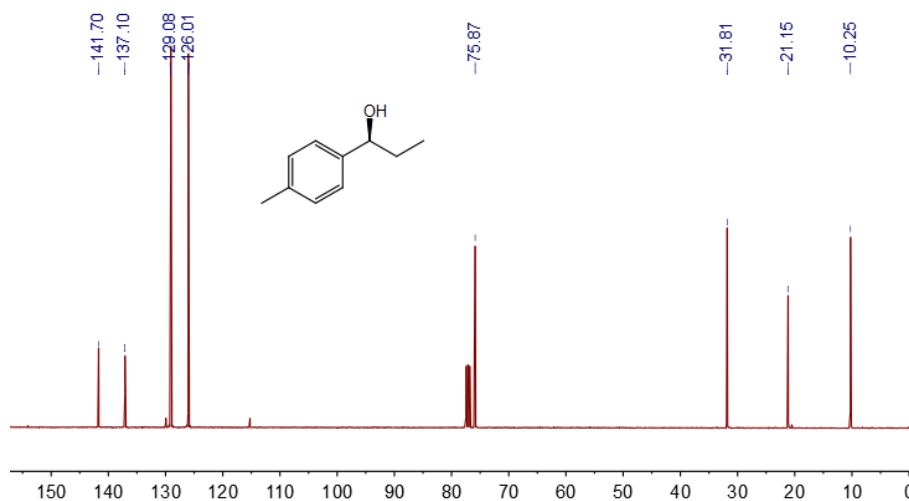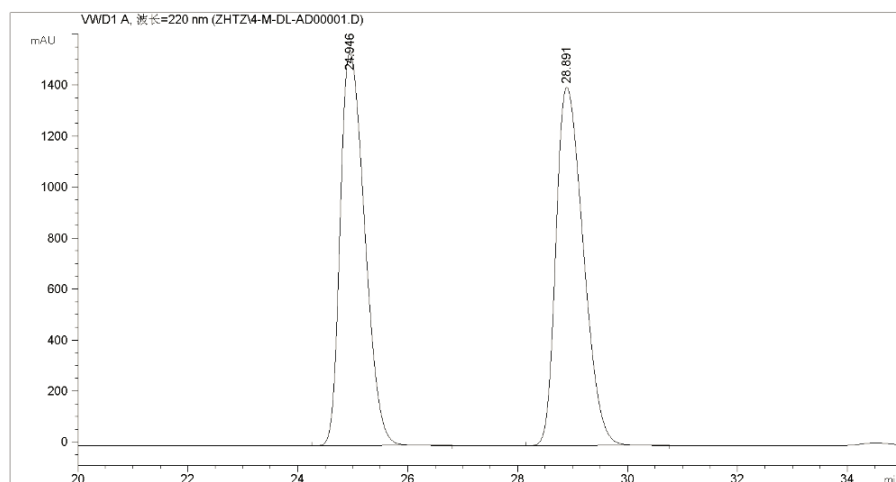

| 峰 # | 保留时间 [min] | 类型 | 峰宽 [min] | 峰面积 mAU *s | 峰高 [mAU]   | 峰面积 %   |
|-----|------------|----|----------|------------|------------|---------|
| 1   | 24.946     | BB | 0.4890   | 4.76262e4  | 1539.83716 | 49.5321 |
| 2   | 28.891     | BB | 0.5426   | 4.85259e4  | 1405.49634 | 50.4679 |

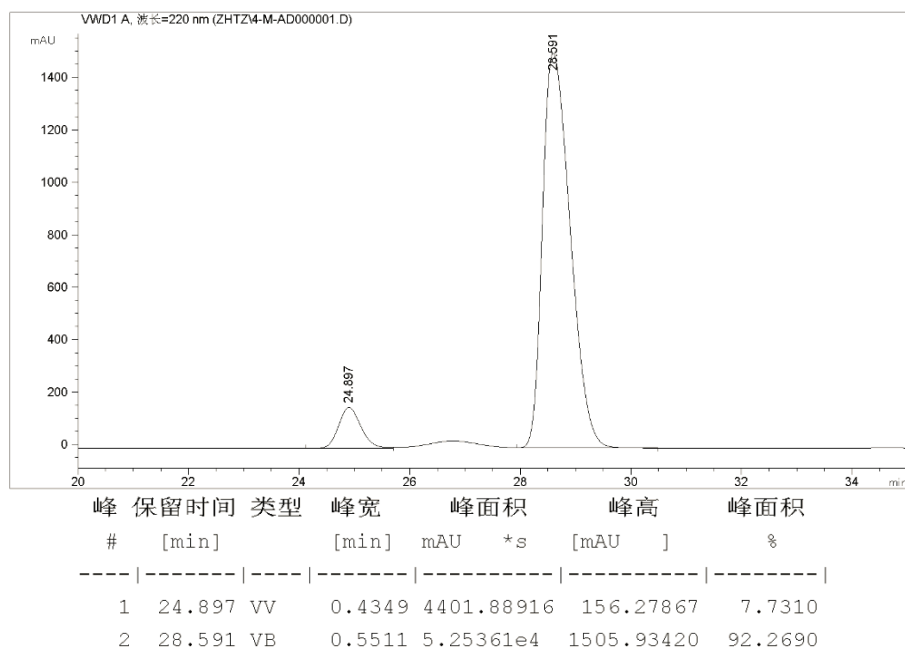

### (S)-1-*m*-tolylpropan-1-ol

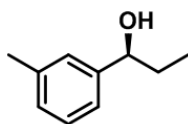

Colorless oil, 89% yield.  $^1\text{H}$  NMR (400 MHz,  $\text{CDCl}_3$ , 298 K)  $\delta$  (ppm): 7.15 (d,  $J = 7.5$  Hz, 1H), 7.08 (d,  $J = 8.6$  Hz, 3H), 4.48 (s, 1H), 2.29 (s, 3H), 1.78 (s, 1H), 1.73 (s, 2H), 0.85 (t,  $J = 7.4$  Hz, 3H).  $^{13}\text{C}$  NMR (100 MHz,  $\text{CDCl}_3$ , 298 K)  $\delta$  (ppm): 143.53, 137.03, 127.25, 125.63, 122.01, 75.05, 30.81, 20.44, 9.19. The enantiomeric excess was determined by chiral HPLC with Daicel chiral OD-H column at 220 nm: 25  $^\circ\text{C}$ ; hexane:iPrOH = 98:2; flow rate = 0.8 mL/min;  $ee = 88\%$ .

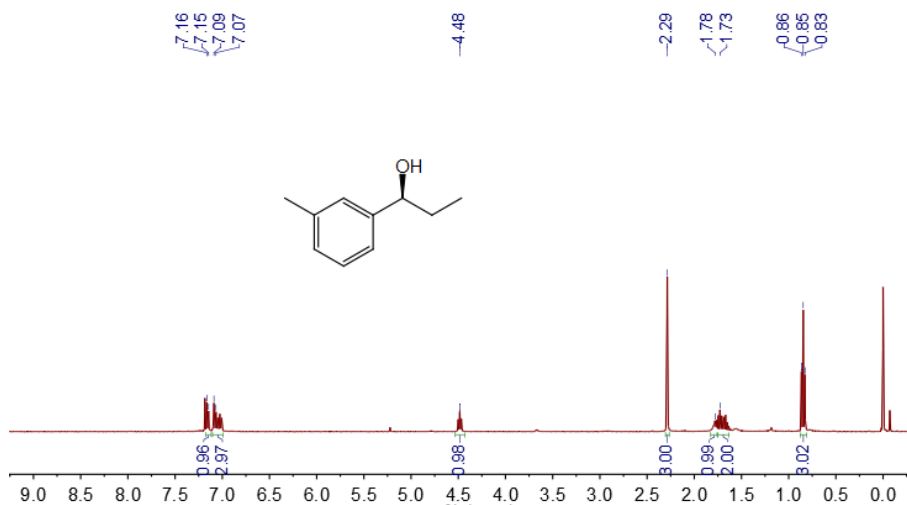

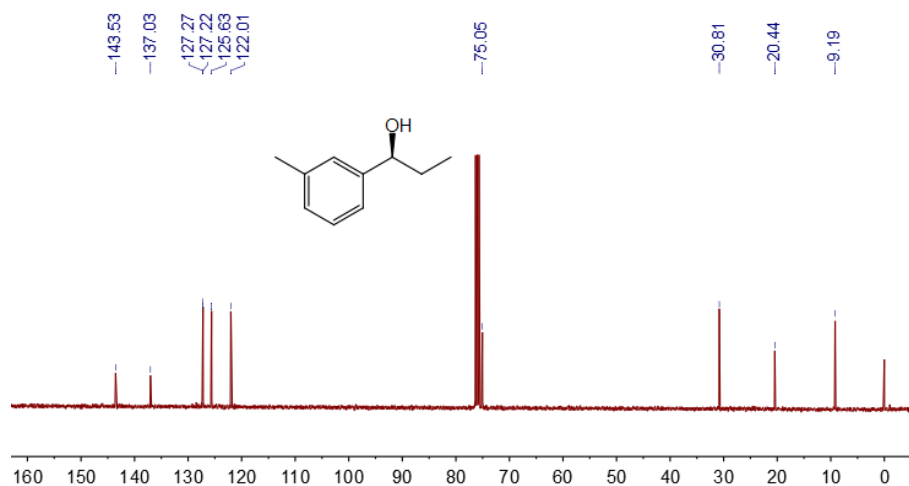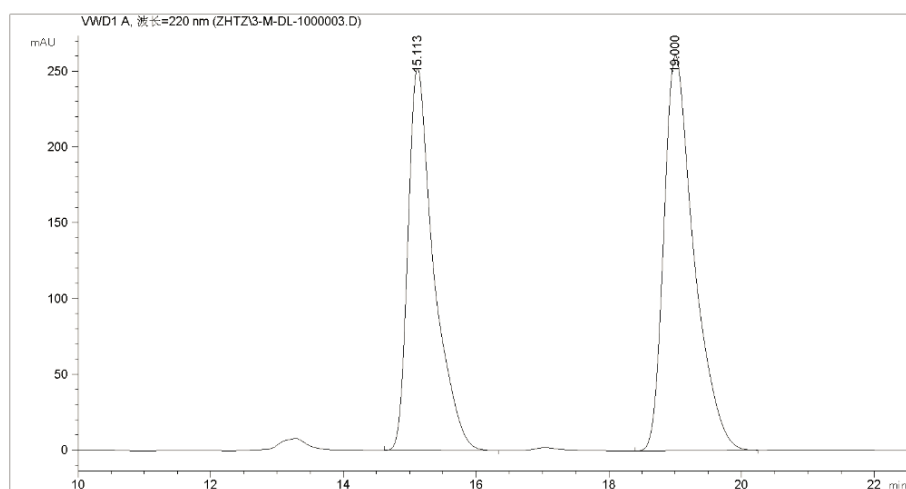

| 峰 # | 保留时间 [min] | 类型 | 峰宽 [min] | 峰面积 mAU *s | 峰高 [mAU]  | 峰面积 %   |
|-----|------------|----|----------|------------|-----------|---------|
| 1   | 15.113     | BB | 0.3965   | 6813.62646 | 252.41710 | 45.3552 |
| 2   | 19.000     | BB | 0.4672   | 8209.17090 | 261.13058 | 54.6448 |

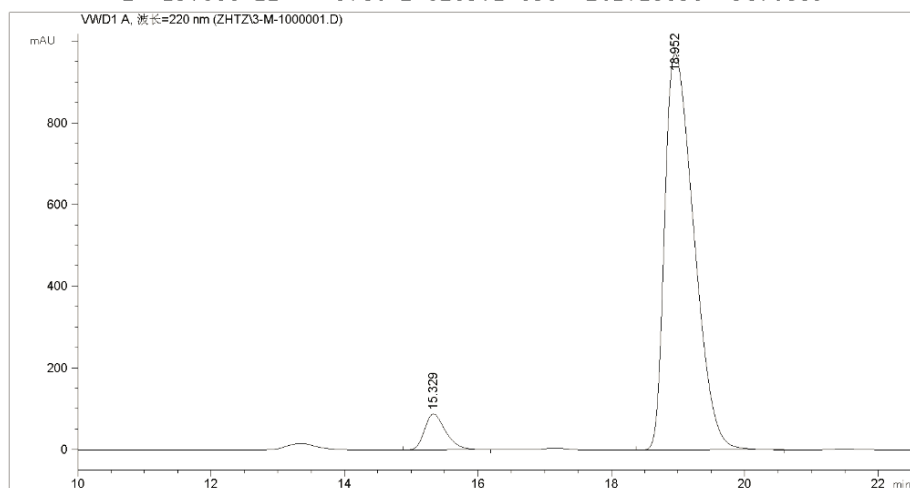

| 峰 # | 保留时间 [min] | 类型 | 峰宽 [min] | 峰面积 mAU *s | 峰高 [mAU]  | 峰面积 %   |
|-----|------------|----|----------|------------|-----------|---------|
| 1   | 15.329     | BB | 0.3351   | 1942.61987 | 88.35589  | 6.1789  |
| 2   | 18.952     | VB | 0.4795   | 2.94967e4  | 971.42786 | 93.8211 |

**(S)-1-(4-butyloxyphenyl) propan-1-ol**

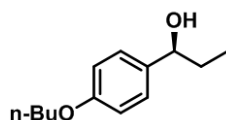

Colorless oil, 83% yield.  $^1\text{H}$  NMR (400 MHz,  $\text{CDCl}_3$ , 298 K)  $\delta$  (ppm): 7.24 (d,  $J = 8.6$  Hz, 2H), 6.87 (d,  $J = 8.7$  Hz, 2H), 4.52 (s, 1H), 3.95 (t,  $J = 6.5$  Hz, 2H), 1.88 (s, 1H), 1.83 – 1.69 (m, 4H), 1.49 (d,  $J = 7.6$  Hz, 2H), 0.97 (t,  $J = 7.4$  Hz, 3H), 0.89 (t,  $J = 7.4$  Hz, 3H).  $^{13}\text{C}$  NMR (100 MHz,  $\text{CDCl}_3$ , 298 K)  $\delta$  (ppm): 161.23, 139.20, 129.80, 117.01, 78.33, 70.37, 34.39, 34.00, 21.90, 16.50, 12.86. The enantiomeric excess was determined by chiral HPLC with Daicel chiral OD-H column at 220 nm: 25  $^\circ\text{C}$ ; hexane:iPrOH = 98:2; flow rate = 0.8 mL/min;  $ee = 84\%$ .

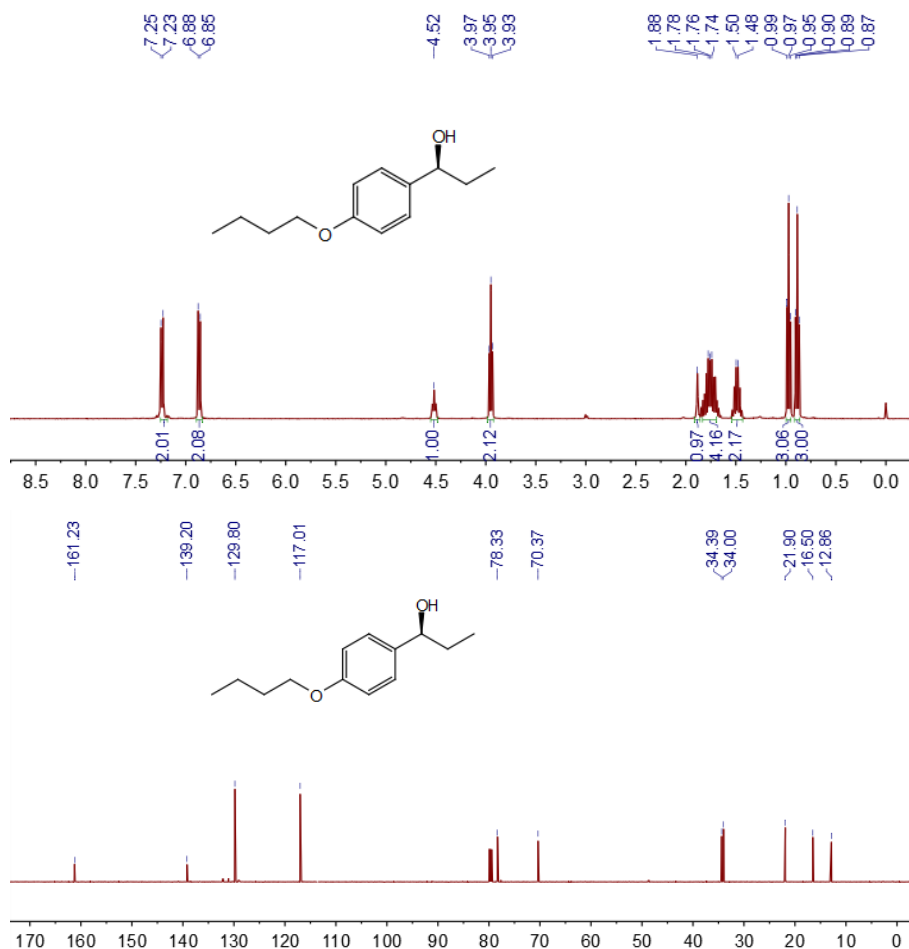

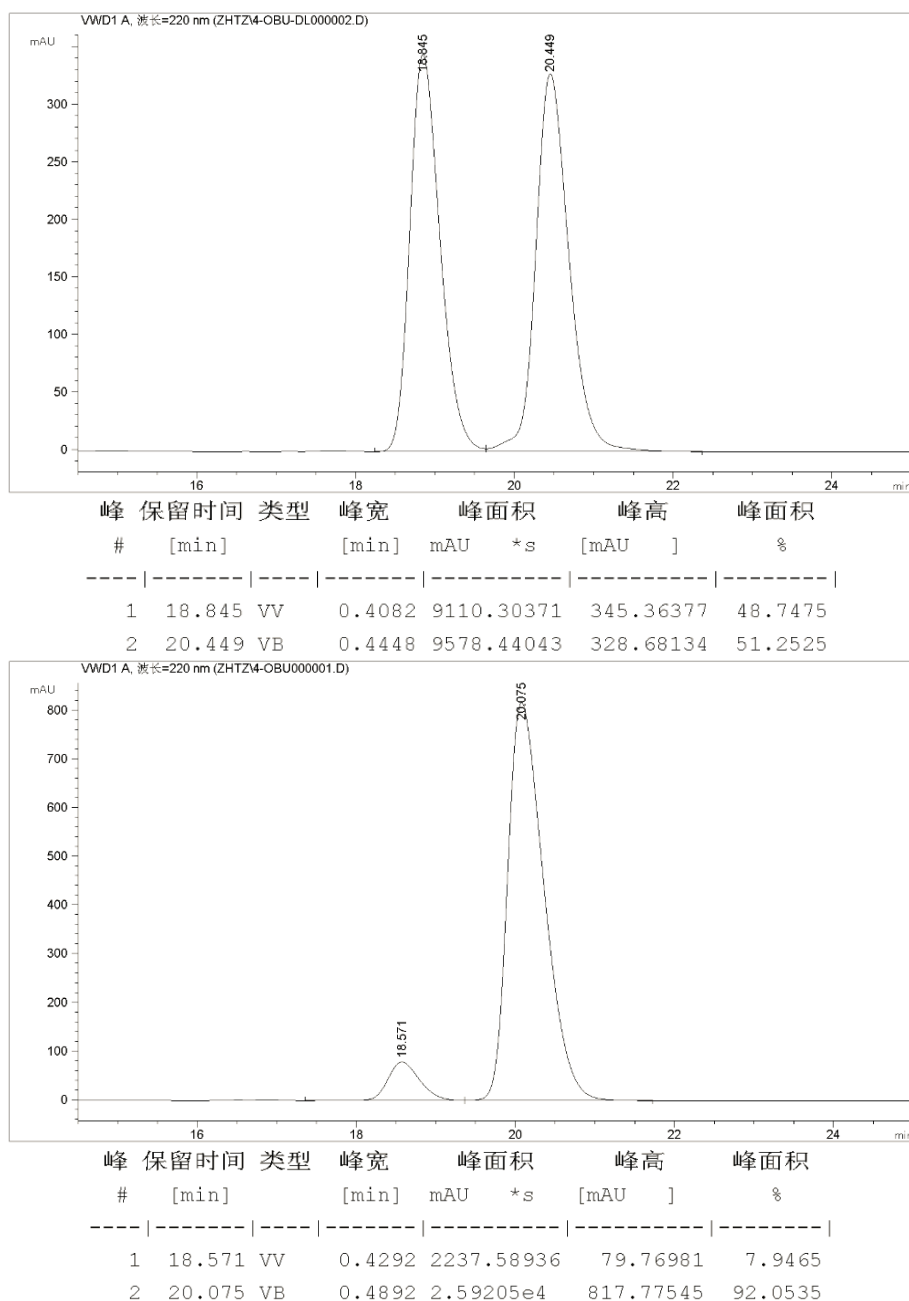

**(S)-1-(4-bromophenyl) propan-1-ol**

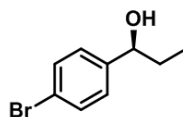

Colorless oil, 90% yield.  $^1\text{H}$  NMR (400 MHz,  $\text{CDCl}_3$ , 298 K)  $\delta$  (ppm): 7.46 (d,  $J = 8.4$  Hz, 2H), 7.20 (d,  $J = 8.4$  Hz, 2H), 4.55 (d,  $J = 2.7$  Hz, 1H), 2.06 (d,  $J = 2.9$  Hz, 1H), 1.74 (d,  $J = 16.1$  Hz, 2H), 0.89 (t,  $J = 7.4$  Hz, 3H).  $^{13}\text{C}$  NMR (100 MHz,  $\text{CDCl}_3$ , 298 K)  $\delta$  (ppm): 143.54, 131.47, 127.73, 121.19, 75.31, 31.92, 9.99. The enantiomeric excess was determined by chiral HPLC with Daicel chiral OD-H column at 220 nm: 25  $^\circ\text{C}$ ; hexane:iPrOH = 97:3; flow rate = 1.0 mL/min;  $ee = 88\%$ .



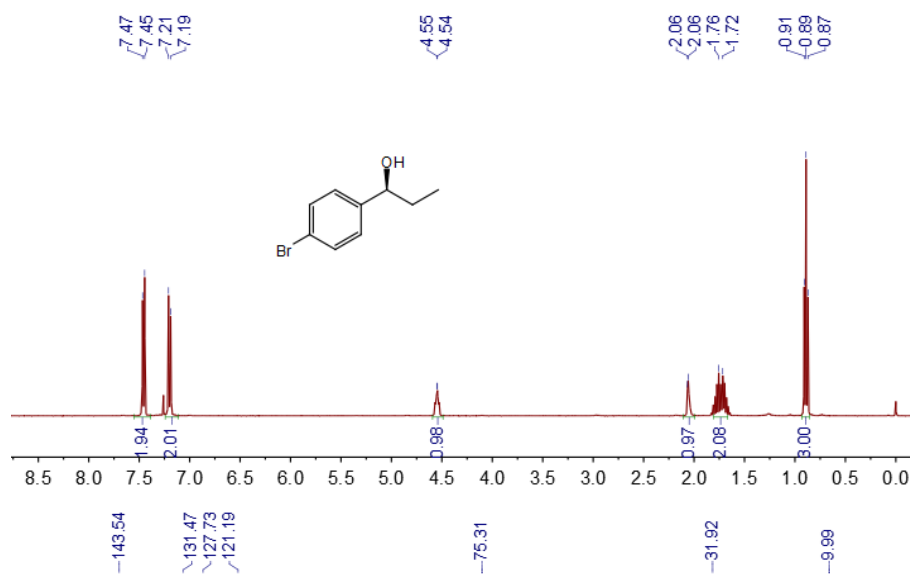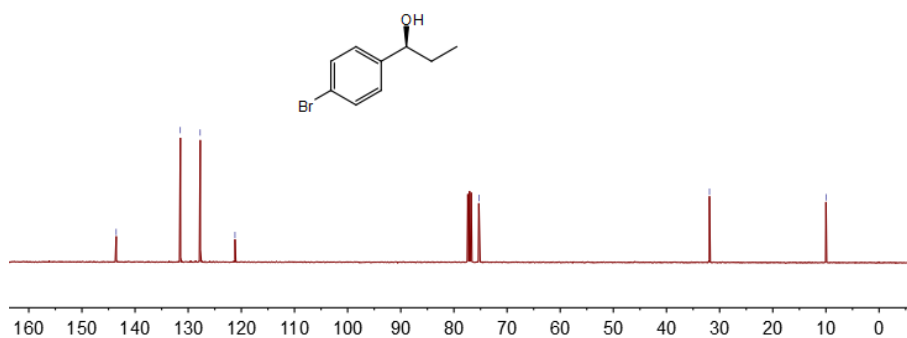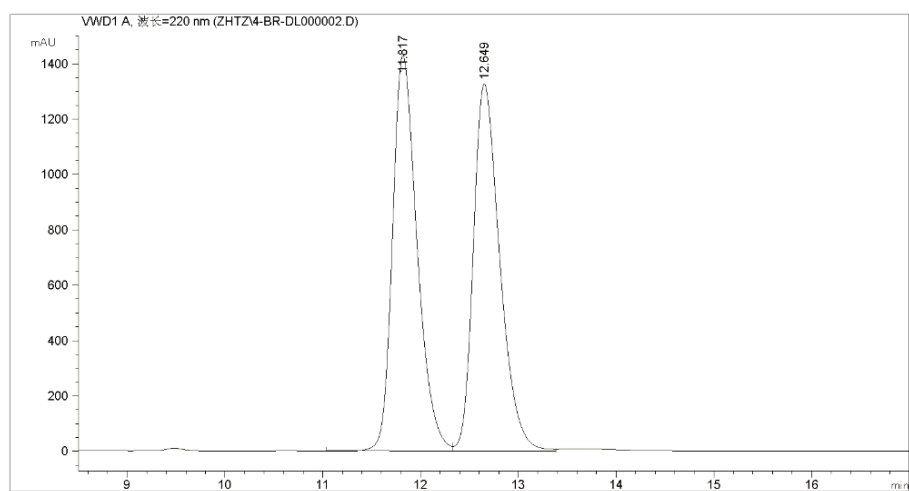

| 峰 # | 保留时间 [min] | 类型 | 峰宽 [min] | 峰面积 mAU *s | 峰高 [mAU]   | 峰面积 %   |
|-----|------------|----|----------|------------|------------|---------|
| 1   | 11.817     | VV | 0.2664   | 2.49743e4  | 1429.89087 | 50.0441 |
| 2   | 12.649     | VV | 0.2877   | 2.49303e4  | 1326.76965 | 49.9559 |

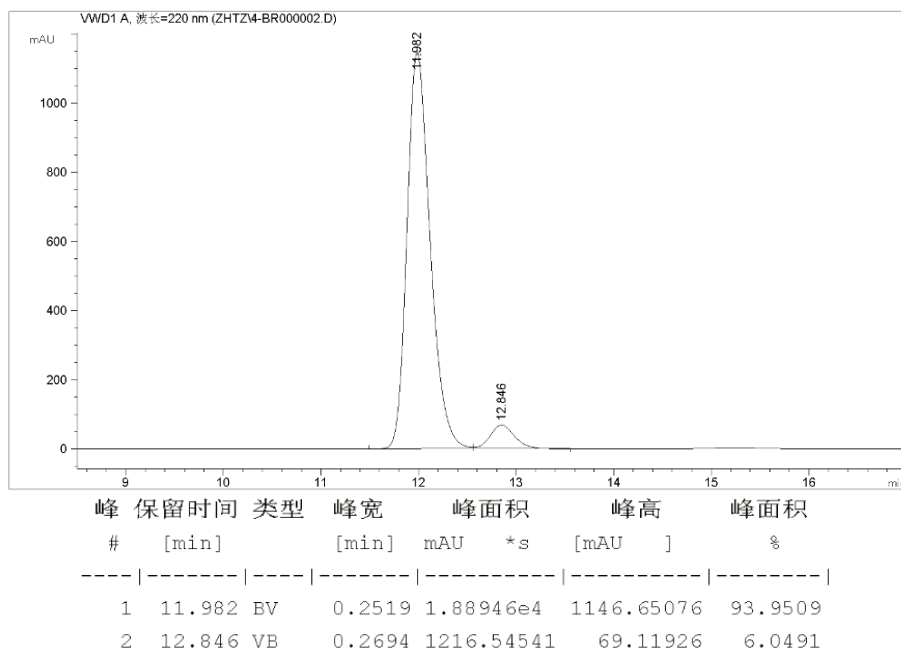

### (S)-1-(3-bromophenyl) propan-1-ol

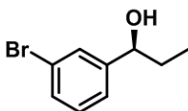

Colorless oil, 92% yield.  $^1\text{H}$  NMR (400 MHz,  $\text{CDCl}_3$ , 298 K)  $\delta$ (ppm): 7.47 (s, 1H), 7.41 – 7.35 (m, 1H), 7.20 (dd,  $J = 5.9, 4.6$  Hz, 2H), 4.52 (s, 1H), 2.36 (d,  $J = 12.3$  Hz, 1H), 1.72 (dd,  $J = 9.0, 1.4$  Hz, 2H), 0.89 (t,  $J = 7.4$  Hz, 3H).  $^{13}\text{C}$  NMR (100 MHz,  $\text{CDCl}_3$ , 298 K)  $\delta$  (ppm): 146.94, 130.49, 129.99, 129.10, 124.64, 122.54, 75.24, 31.91, 10.01. The enantiomeric excess was determined by chiral HPLC with Daicel chiral OD-H column at 220 nm: 25  $^\circ\text{C}$ ; hexane:iPrOH = 97:3; flow rate = 1.0 mL/min;  $ee = 95\%$ .

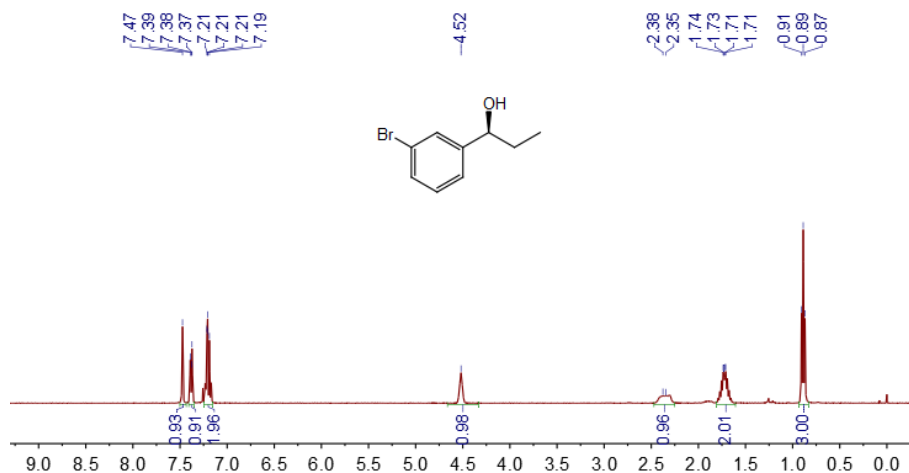

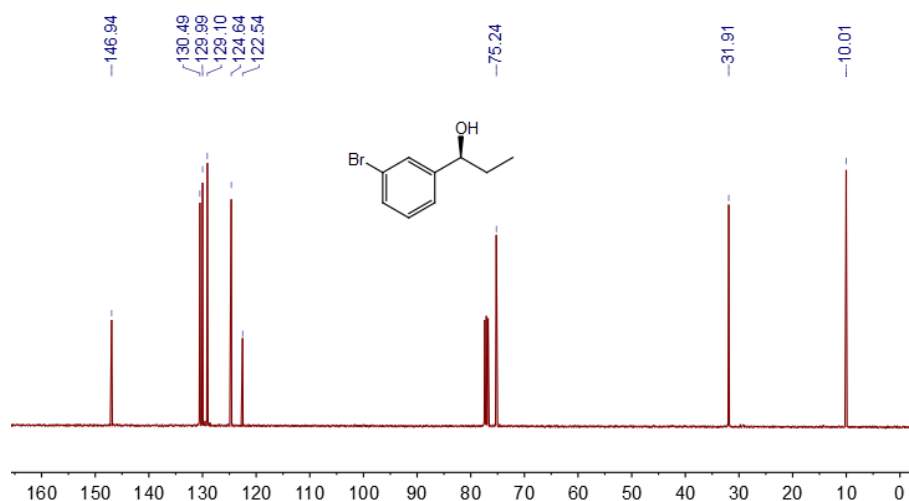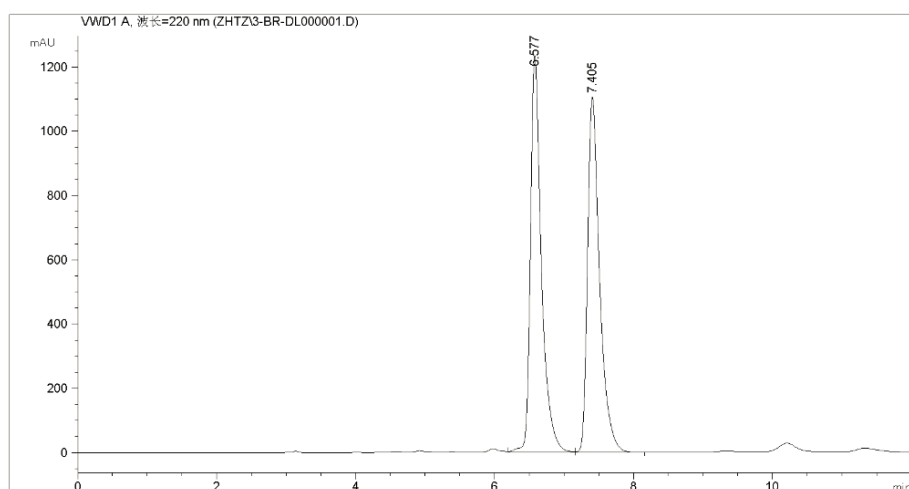

| 峰 # | 保留时间 [min] | 类型 | 峰宽 [min] | 峰面积 mAU *s | 峰高 [mAU]   | 峰面积 %   |
|-----|------------|----|----------|------------|------------|---------|
| 1   | 6.577      | VV | 0.1631   | 1.35679e4  | 1235.32275 | 50.3970 |
| 2   | 7.405      | VB | 0.1816   | 1.33541e4  | 1106.50684 | 49.6030 |

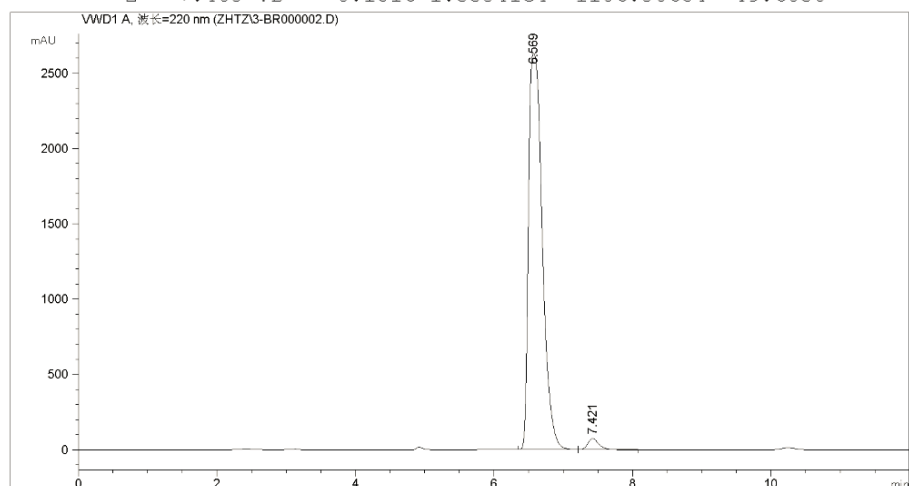

| 峰 # | 保留时间 [min] | 类型 | 峰宽 [min] | 峰面积 mAU *s | 峰高 [mAU]   | 峰面积 %   |
|-----|------------|----|----------|------------|------------|---------|
| 1   | 6.569      | VV | 0.2147   | 3.63080e4  | 2633.29858 | 97.6278 |
| 2   | 7.421      | VB | 0.1725   | 882.21826  | 76.46769   | 2.3722  |

**(S)-1-(3-chlorophenyl) propan-1-ol**

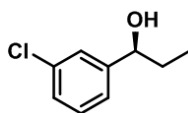

Colorless oil, 89% yield.  $^1\text{H}$  NMR (400 MHz,  $\text{CDCl}_3$ , 298 K)  $\delta$  (ppm): 7.35–7.13 (m, 4H), 4.54 (s, 1H), 2.31 (s, 1H), 1.75 (s, 2H), 0.89 (t,  $J = 7.4$  Hz, 3H).  $^{13}\text{C}$  NMR (100 MHz,  $\text{CDCl}_3$ , 298 K)  $\delta$  (ppm): 146.67, 134.27, 129.67, 127.55, 126.17, 124.16, 75.29, 31.89, 9.98. The enantiomeric excess was determined by chiral HPLC with Daicel chiral OD-H column at 220 nm: 25  $^\circ\text{C}$ ; hexane:iPrOH = 98:2; flow rate = 1.0 mL/min;  $ee = 93\%$ .

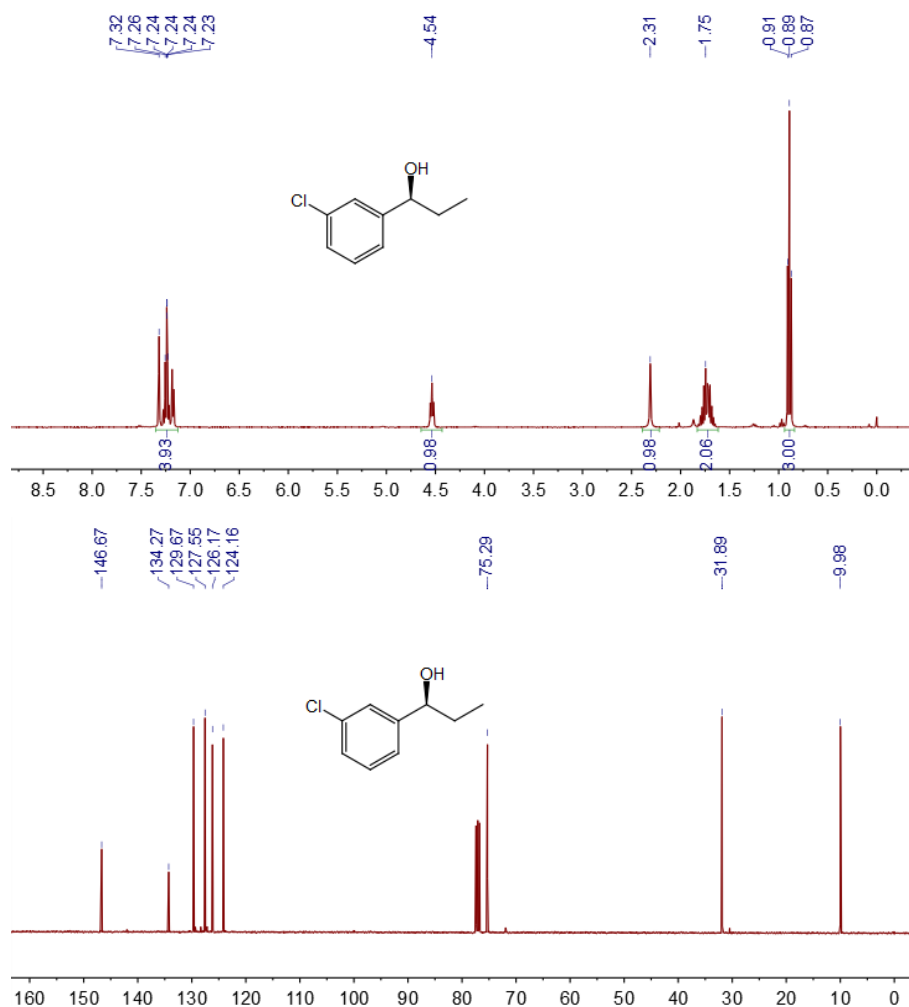

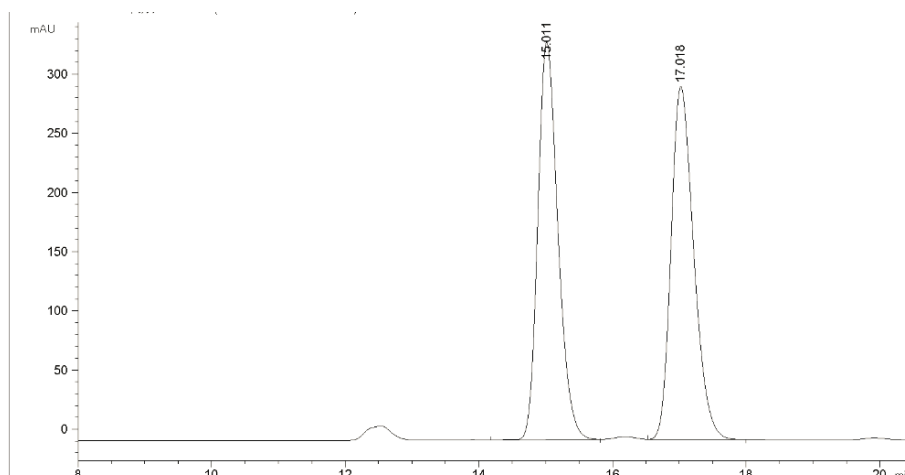

| 峰 # | 保留时间 [min] | 类型 | 峰宽 [min] | 峰面积 mAU *s | 峰高 [mAU]  | 峰面积 %   |
|-----|------------|----|----------|------------|-----------|---------|
| 1   | 15.011     | VV | 0.3218   | 7055.92920 | 336.49625 | 50.0311 |
| 2   | 17.018     | VB | 0.3626   | 7047.16016 | 298.71158 | 49.9689 |

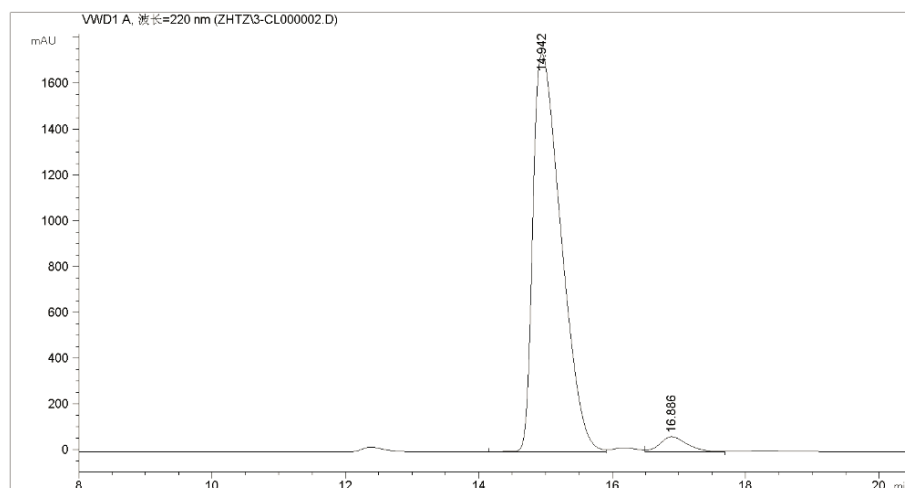

| 峰 # | 保留时间 [min] | 类型 | 峰宽 [min] | 峰面积 mAU *s | 峰高 [mAU]   | 峰面积 %   |
|-----|------------|----|----------|------------|------------|---------|
| 1   | 14.942     | VV | 0.4523   | 5.09194e4  | 1738.98767 | 96.4366 |
| 2   | 16.886     | VB | 0.4244   | 1881.48926 | 66.27860   | 3.5634  |

### (S)- 1-(naphthalen-2-yl) propan-1-ol

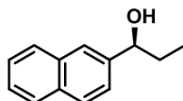

Yellow solid, 92% yield.  $^1\text{H}$  NMR (400 MHz,  $\text{CDCl}_3$ , 298 K)  $\delta$  (ppm): 7.84 (dd,  $J = 4.8$ , 3.6 Hz, 3H), 7.77 (s, 1H), 7.48 (d,  $J = 7.0$  Hz, 3H), 4.76 (s, 1H), 2.13 (s, 1H), 1.89 (dd,  $J = 21.6$ , 14.3 Hz, 2H), 0.95 (t,  $J = 7.4$  Hz, 3H).  $^{13}\text{C}$  NMR (100 MHz,  $\text{CDCl}_3$ , 298 K)  $\delta$  (ppm): 141.96, 133.28, 133.00, 128.26, 127.96, 127.72, 126.14, 125.81, 124.77, 124.18, 76.14, 31.79, 10.20. The enantiomeric excess was determined by chiral HPLC with Daicel chiral OD-H column at 254 nm: 25 °C; hexane:iPrOH = 90:10; flow rate = 1.0 mL/min;  $ee = 96\%$ .

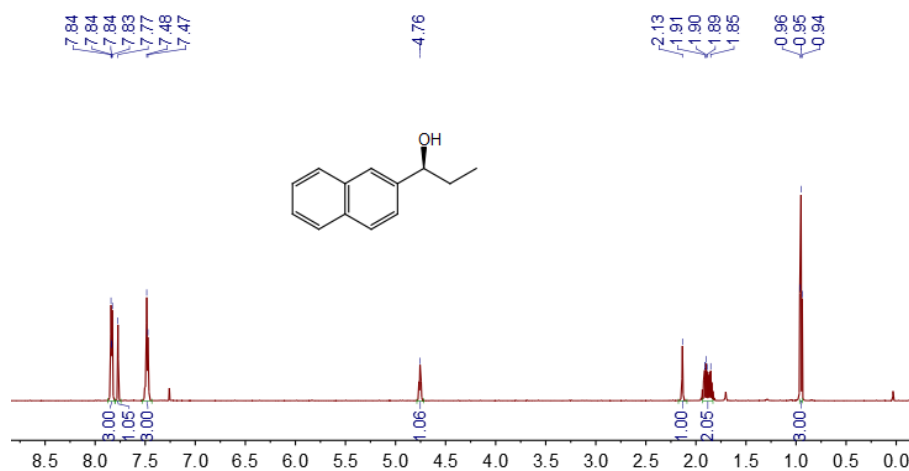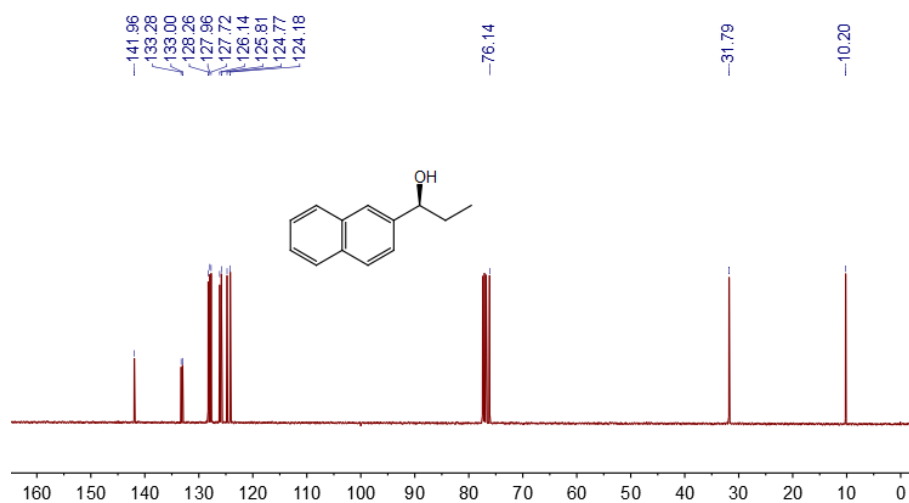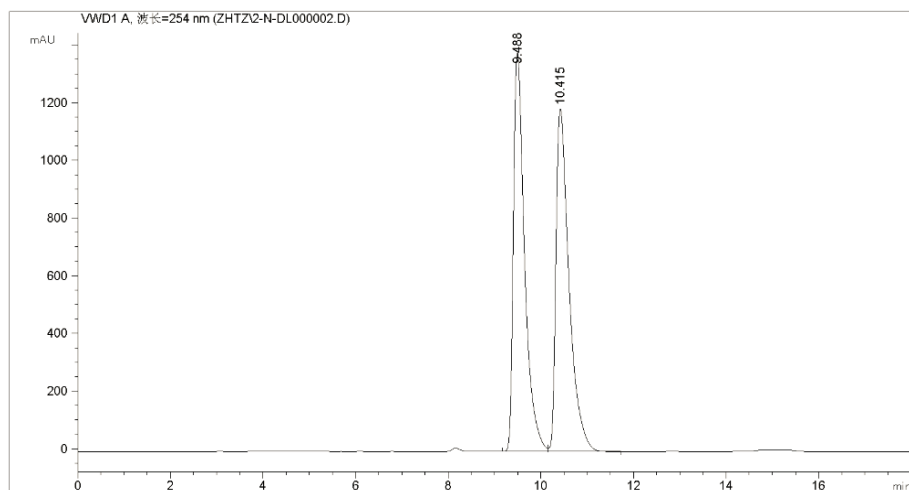

| 峰 # | 保留时间 [min] | 类型 | 峰宽 [min] | 峰面积 mAU *s | 峰高 [mAU]   | 峰面积 %   |
|-----|------------|----|----------|------------|------------|---------|
| 1   | 9.488      | VV | 0.2524   | 2.31985e4  | 1383.44226 | 49.8235 |
| 2   | 10.415     | VB | 0.2946   | 2.33628e4  | 1189.62500 | 50.1765 |

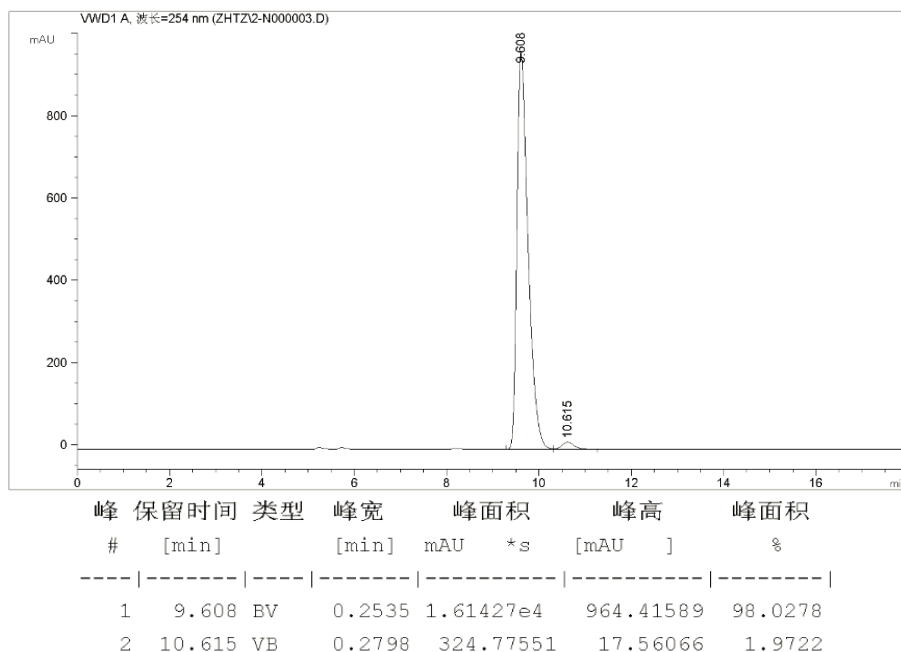

**(S)- 1-(naphthalen-1-yl) propan-1-ol**

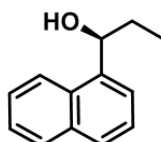

Yellow oil, 85% yield.  $^1\text{H}$  NMR (400 MHz,  $\text{CDCl}_3$ , 298 K)  $\delta$  (ppm): 8.11 (d,  $J = 8.0$  Hz, 1H), 7.97–7.84 (m, 1H), 7.79 (d,  $J = 8.2$  Hz, 1H), 7.62 (d,  $J = 7.1$  Hz, 1H), 7.50 (d,  $J = 23.7$  Hz, 3H), 5.36 (s, 1H), 2.44–2.27 (m, 1H), 2.04–1.89 (m, 2H), 1.03 (t,  $J = 7.4$  Hz, 3H).  $^{13}\text{C}$  NMR (100 MHz,  $\text{CDCl}_3$ , 298 K)  $\delta$  (ppm): 140.30, 133.85, 130.56, 128.94, 127.89, 125.96, 125.50 (d,  $J = 6.0$  Hz), 123.32, 123.00, 72.54, 31.13, 10.59. The enantiomeric excess was determined by chiral HPLC with Daicel chiral OD-H column at 254 nm: 25 °C; hexane:iPrOH = 90:10; flow rate = 1.0 mL/min;  $ee = 86\%$ .

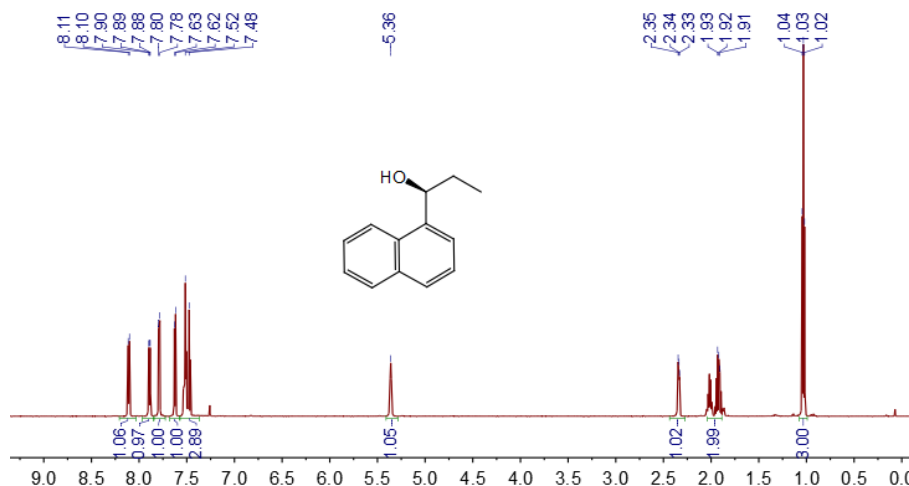

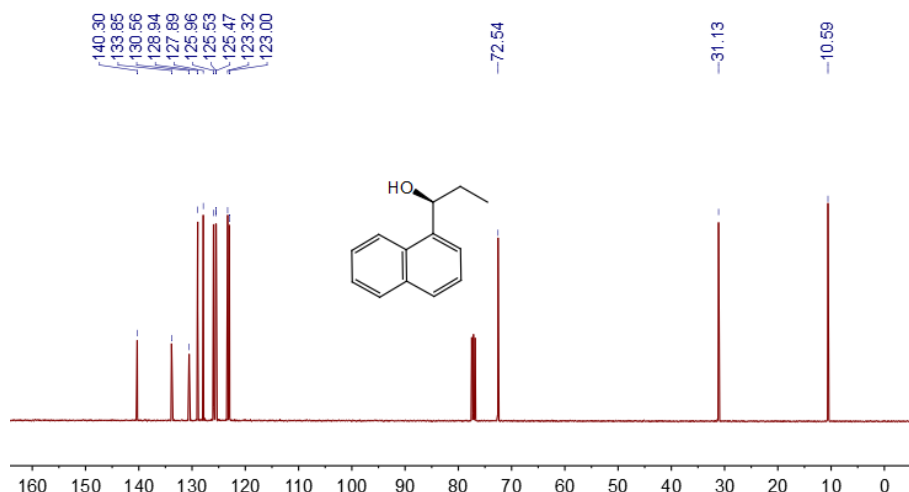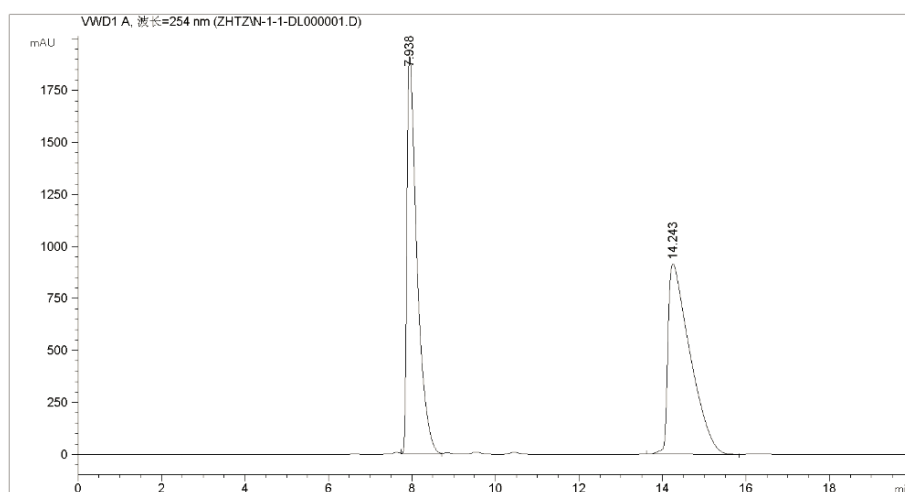

| 峰 # | 保留时间 [min] | 类型 | 峰宽 [min] | 峰面积 mAU *s | 峰高 [mAU]   | 峰面积 %   |
|-----|------------|----|----------|------------|------------|---------|
| 1   | 7.938      | VV | 0.2488   | 3.22866e4  | 1917.72559 | 48.9328 |
| 2   | 14.243     | VB | 0.5260   | 3.36949e4  | 917.52094  | 51.0672 |

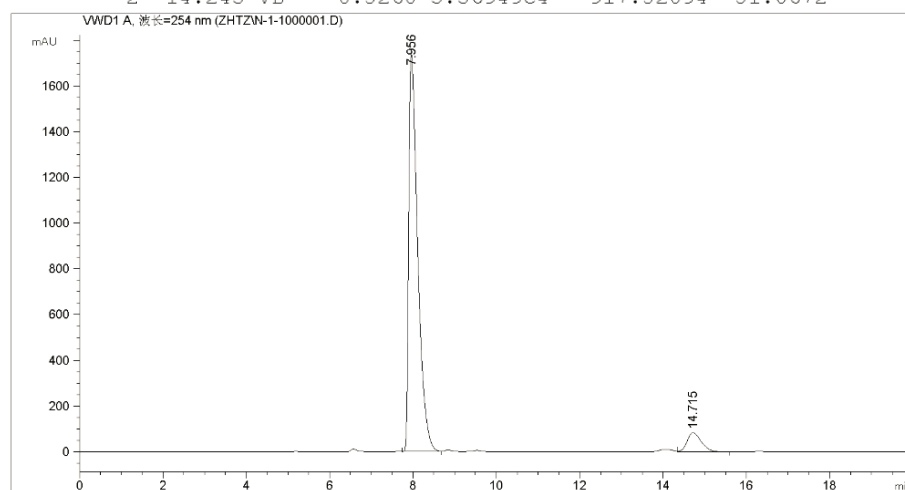

| 峰 # | 保留时间 [min] | 类型 | 峰宽 [min] | 峰面积 mAU *s | 峰高 [mAU]   | 峰面积 %   |
|-----|------------|----|----------|------------|------------|---------|
| 1   | 7.956      | VV | 0.2265   | 2.61583e4  | 1738.85535 | 92.9302 |
| 2   | 14.715     | VB | 0.3666   | 1990.03064 | 83.57822   | 7.0698  |



**(S)-1-(pyren-1-yl) propan-1-ol**

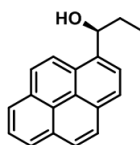

Yellow solid, 81% yield.  $^1\text{H}$  NMR (400 MHz,  $\text{CDCl}_3$ , 298 K)  $\delta$  (ppm): 8.31 (d,  $J = 9.3$  Hz, 1H), 8.22–8.11 (m, 4H), 8.07 (d,  $J = 9.3$  Hz, 1H), 8.04–7.92 (m, 3H), 5.68 (t,  $J = 6.4$  Hz, 1H), 2.21 (s, 1H), 2.11–2.02 (m, 2H), 1.03 (t,  $J = 7.4$  Hz, 3H).  $^{13}\text{C}$  NMR (100 MHz,  $\text{CDCl}_3$ , 298 K)  $\delta$  (ppm): 138.06, 131.40, 130.63, 127.55, 127.19, 125.92, 125.22, 124.95, 123.36, 122.56, 72.65, 31.97, 10.59. The enantiomeric excess was determined by chiral HPLC with Daicel chiral OD-H column at 220 nm: 25 °C; hexane:iPrOH = 90:10; flow rate = 1.0 mL/min;  $ee = 82\%$ .

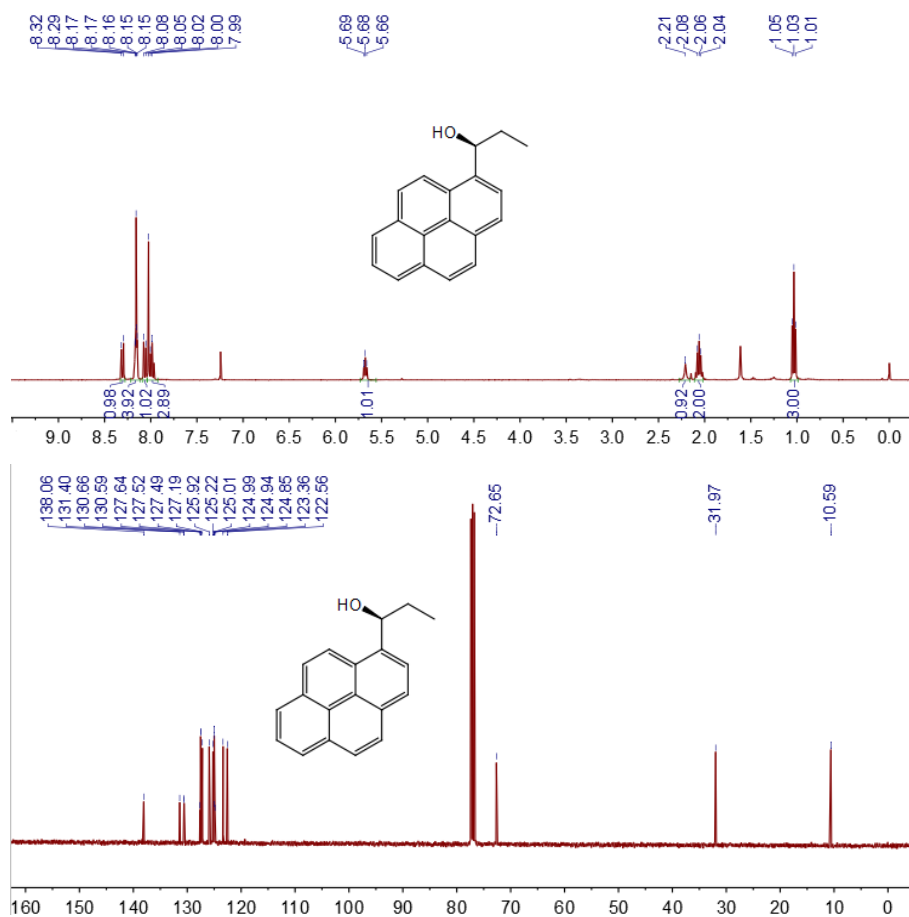

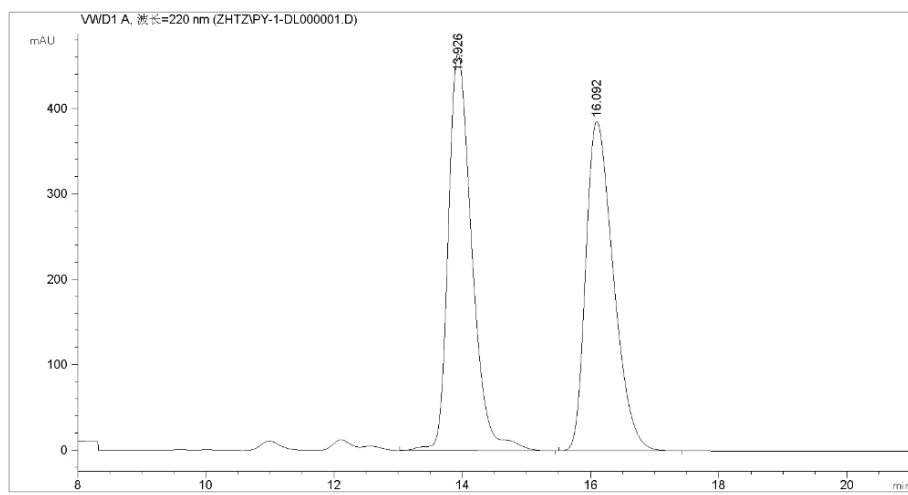

| 峰 # | 保留时间 [min] | 类型 | 峰宽 [min] | 峰面积 mAU *s | 峰高 [mAU]  | 峰面积 %   |
|-----|------------|----|----------|------------|-----------|---------|
| 1   | 13.926     | VB | 0.3910   | 1.18679e4  | 464.95300 | 50.7225 |
| 2   | 16.092     | BB | 0.4622   | 1.15298e4  | 385.78293 | 49.2775 |

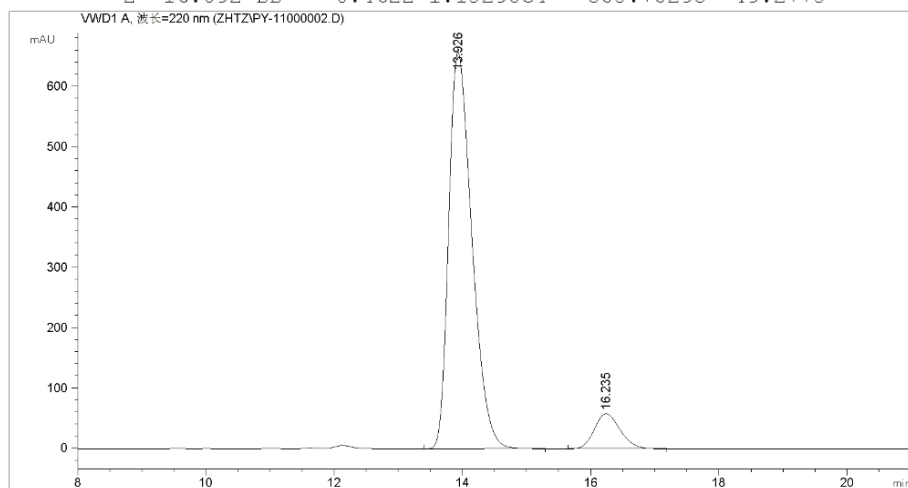

| 峰 # | 保留时间 [min] | 类型 | 峰宽 [min] | 峰面积 mAU *s | 峰高 [mAU]  | 峰面积 %   |
|-----|------------|----|----------|------------|-----------|---------|
| 1   | 13.926     | BB | 0.3896   | 1.65413e4  | 657.54730 | 90.9713 |
| 2   | 16.235     | BB | 0.4379   | 1641.69214 | 58.26885  | 9.0287  |

## 8. Recycle experiments of TADP5.

**General procedure of recycle experiments:** After the reaction was quenched by diluted HCl and ethyl ether, the insoluble solid was filtered. The solid was washed thoroughly with diluted HCl, acetone and toluene to eliminate metal salts or organic residuals, followed by dried in vacuum. The dried solid was reloaded with titanate in a new run. After each run, the product was isolated through column chromatography and dissolved in isopropanol for chiral HPLC analysis. The results were summarized as follows.

Table S1. Evaluation of recyclability of **TADP5**.

| Run <sup>[a]</sup> | Yield <sup>[b]</sup> [%] | <i>ee</i> <sup>[c]</sup> [%] |
|--------------------|--------------------------|------------------------------|
| 1                  | 88                       | 94                           |
| 2                  | 89                       | 92                           |
| 3                  | 85                       | 89                           |
| 4                  | 85                       | 92                           |
| 5                  | 83                       | 91                           |
| 6                  | 80                       | 85                           |

[a] Reaction condition is the same as the general condition. [b] Isolated yield. [c] Determined by chiral HPLC.

Chiral HPLC data of each run: Daicel chiral OD-H column at 220 nm; 28 °C; hexane:iPrOH = 98:2; flow rate = 1.0 mL/min.

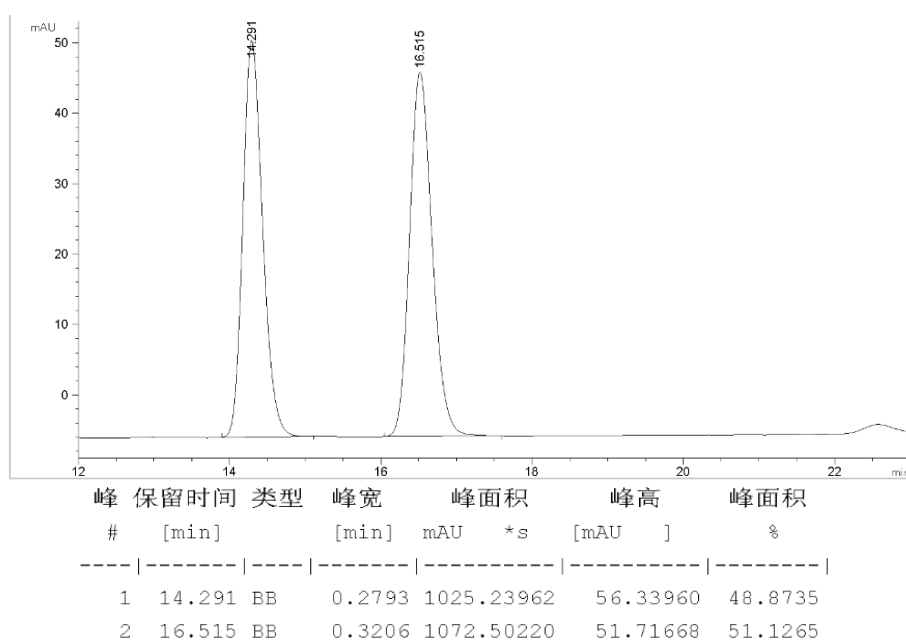

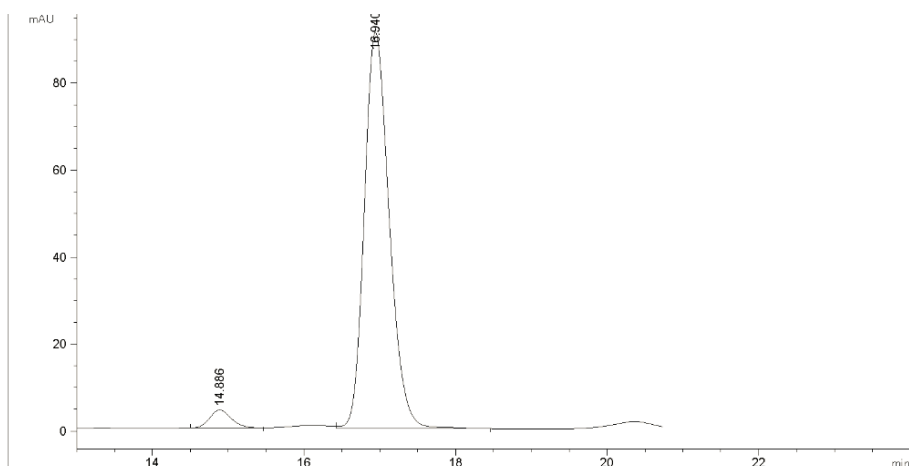

| 峰 # | 保留时间 [min] | 类型 | 峰宽 [min] | 峰面积 mAU *s | 峰高 [mAU] | 峰面积 %   |
|-----|------------|----|----------|------------|----------|---------|
| 1   | 14.886     | BV | 0.3124   | 86.89630   | 4.23138  | 3.9986  |
| 2   | 16.940     | VB | 0.3544   | 2086.24976 | 91.12978 | 96.0014 |

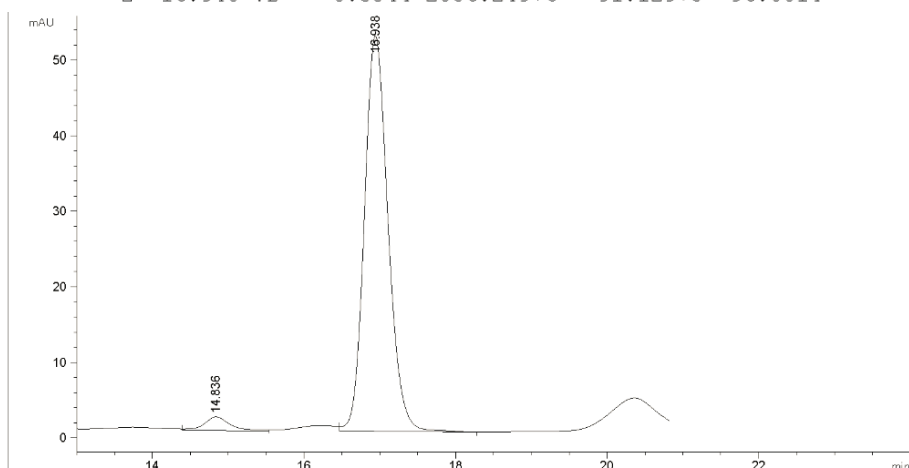

| 峰 # | 保留时间 [min] | 类型 | 峰宽 [min] | 峰面积 mAU *s | 峰高 [mAU] | 峰面积 %   |
|-----|------------|----|----------|------------|----------|---------|
| 1   | 14.836     | VV | 0.3625   | 45.94350   | 1.85017  | 3.8782  |
| 2   | 16.938     | VB | 0.3350   | 1138.71997 | 52.42113 | 96.1218 |

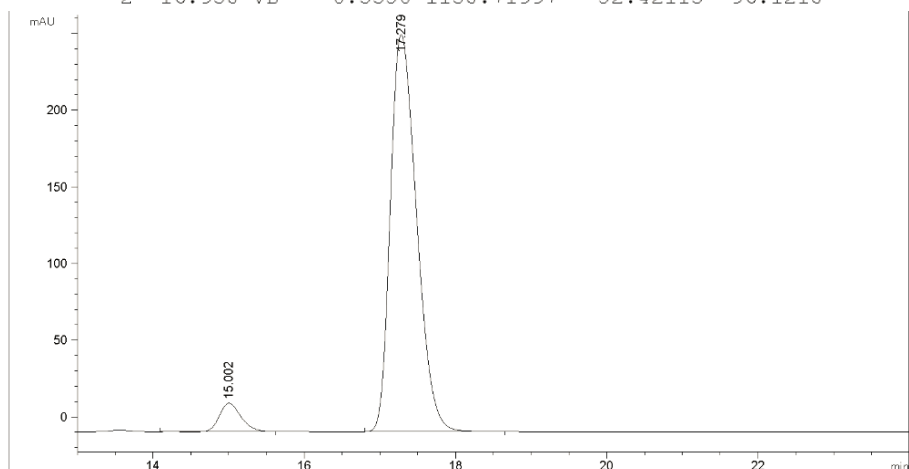

| 峰 # | 保留时间 [min] | 类型 | 峰宽 [min] | 峰面积 mAU *s | 峰高 [mAU]  | 峰面积 %   |
|-----|------------|----|----------|------------|-----------|---------|
| 1   | 15.002     | BV | 0.3050   | 372.02710  | 18.69544  | 5.6362  |
| 2   | 17.279     | BB | 0.3796   | 6228.65820 | 258.96466 | 94.3638 |

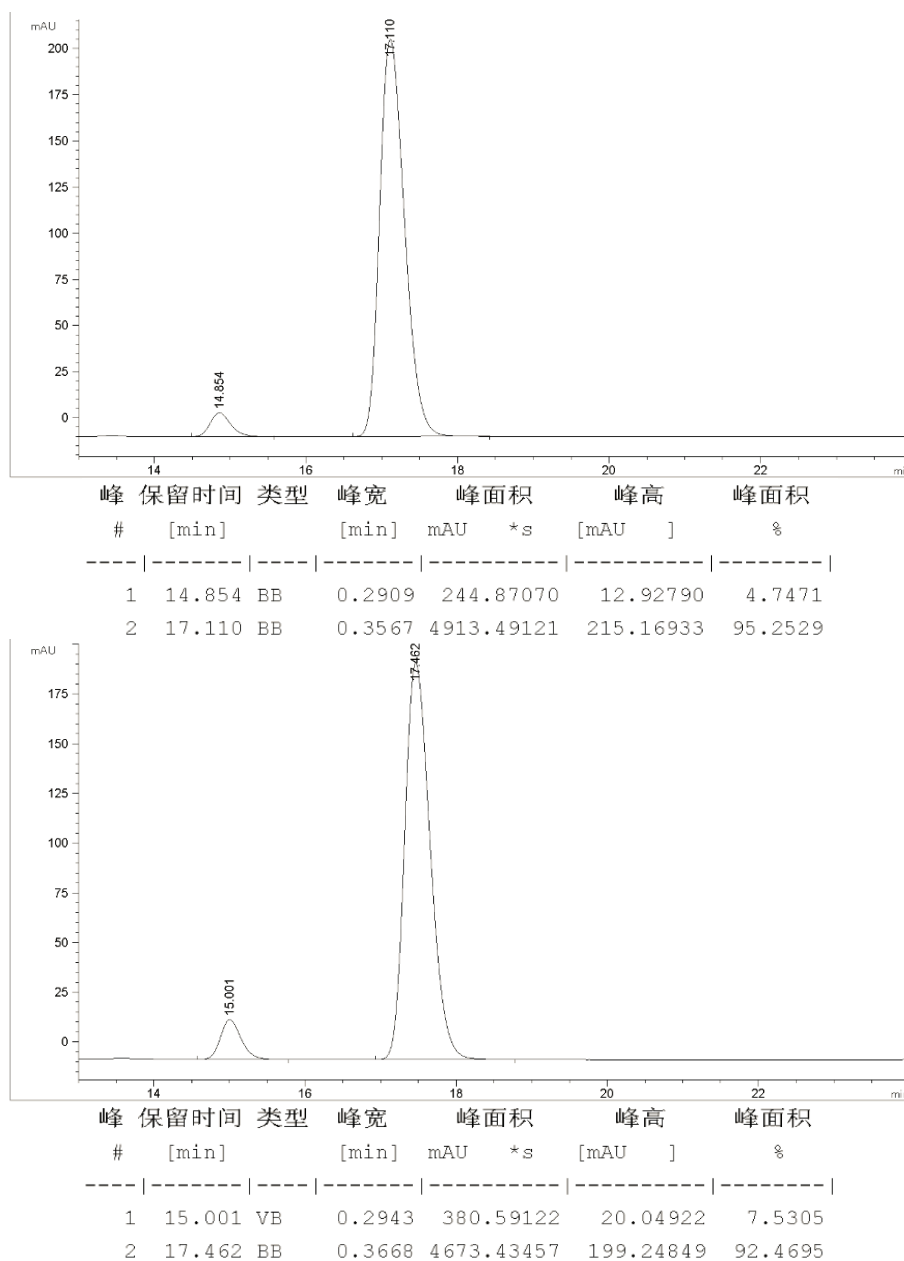

## 10. Comparison of the heterogeneous catalyst and the homogeneous catalyst

**TADDOL** was used as a homogeneous catalyst for the addition reaction between benzaldehyde and diethyl zinc under the same conditions. The isolated yield of (*S*)-1-phenylpropan-1-ol was 89% and the *ee* value was determined to be 96% using chiral HPLC (Daicel chiral OD-H column at 220 nm; 25 °C; hexane: iPrOH = 98:2; flow rate = 1.0 mL/min).

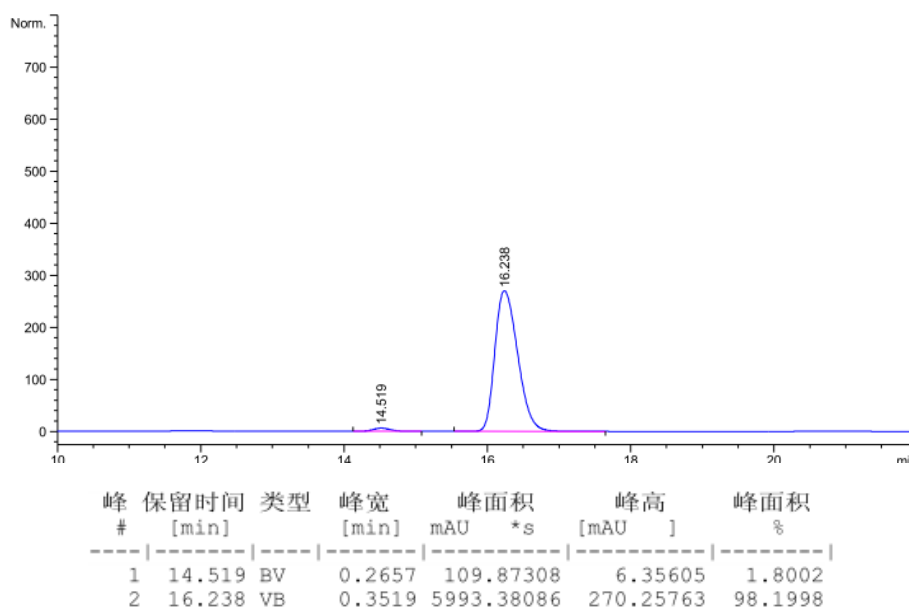

The reactions catalyzed by **TADP5Ti** and **TADDOL/Ti<sup>IV</sup>** were monitored in a certain time in order to study the kinetic profiles of the two reactions. The results were shown below.

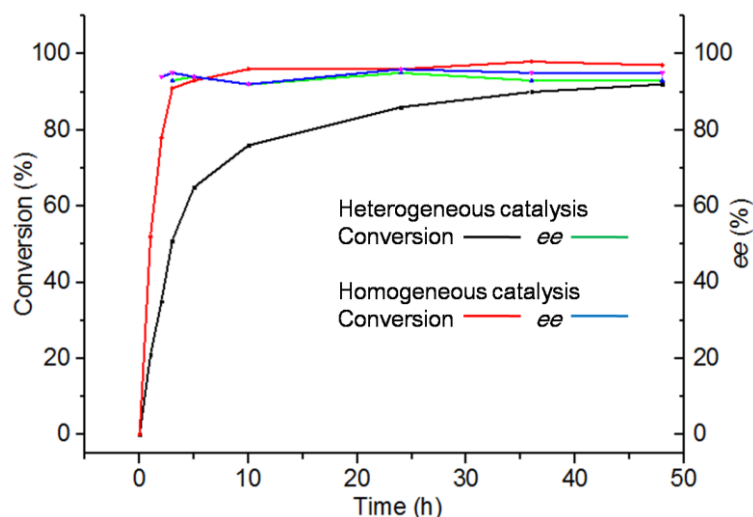

**Fig. S16** Kinetic profiles of the reactions catalyzed by the heterogeneous catalyst and homogeneous catalyst.

From the studies of kinetic properties, we observed that the heterogeneous catalyst had some small flaws compared with homogeneous catalyst. Our polymer had slightly lower activity and enantioselectivity under the same reaction conditions. However, our heterogeneous catalyst is recyclable, which is an important advantage.

### *References*

- S1. Y. Ma, X. Ji, F. Xiang, X. Chi, C. Han, J. He, Z. Abliz, W. Chen and F. Huang, *Chem. Commun.*, 2011, **47**, 12340.
- S2. W.-J. Hu, X.-L. Zhao, M.-L. Ma, F. Guo, X.-Q. Mi, B. Jiang and K. Wen, *Eur. J. Org. Chem.* 2012, **7**, 1448.
- S3. T. Werner, M. Bauer, A. M. Riahi and H. Schramm, *Eur. J. Org. Chem.* 2014, 4876.
